# Supplementary material for: Modeling Co-Expression across Species for Complex Traits: Insights to the Difference of Human and Mouse Embryonic Stem Cells
Source: PLoS Comput Biol. 2010 Mar 12;6(3):e1000707. doi: 10.1371/journal.pcbi.1000707 (PMC2837392; doi:10.1371/journal.pcbi.1000707)

**Figure S2: SCSC clusters of mouse and human ES cell differentiation.** (A) Sample information for human ES cells. (B) The number of orthologous probe sets in each result cluster, and (C) the corresponding expression patterns of mouse and human clusters. Each dot represents the mean expression of a cluster in a biological replicate.

**A**

| <b>Symbols</b> | <b>Cell lines</b>                                     | <b>Reference</b> |
|----------------|-------------------------------------------------------|------------------|
| A1             | Undifferentiated H1 ES cells                          | [1]              |
| A2             | Differentiated H1 ES cells                            |                  |
| B1             | ES cells                                              | [2]              |
| B2             | Hematopoietic stem/progenitor cells (HSPC)            |                  |
| B3             | Hematopoietic differentiated cells (HDC)              |                  |
| B4             | Epidermis' keratinocytes stem/progenitor cells (KSPC) |                  |
| B5             | Epidermis differentiated cells, (KDC)                 |                  |
| C1             | Finnish ES cells (FES)                                | [3]              |
| C2             | Swedish ES cells (HS)                                 |                  |
| C3             | Fibroblasts                                           |                  |
| D              | HSF-1, HSF-6 and H9 ES cells                          | [4]              |

**B**

| Cluster index of human data \ Cluster index of mouse data | 1   | 2   | 3   | 4   | 5   | 6   |
|-----------------------------------------------------------|-----|-----|-----|-----|-----|-----|
| 1                                                         | 291 | 190 | 122 | 266 | 188 | 200 |
| 2                                                         | 317 | 224 | 150 | 174 | 106 | 238 |
| 3                                                         | 178 | 177 | 236 | 98  | 116 | 125 |
| 4                                                         | 237 | 141 | 95  | 136 | 90  | 231 |
| 5                                                         | 132 | 75  | 233 | 149 | 186 | 41  |
| 6                                                         | 245 | 157 | 111 | 162 | 135 | 136 |

C

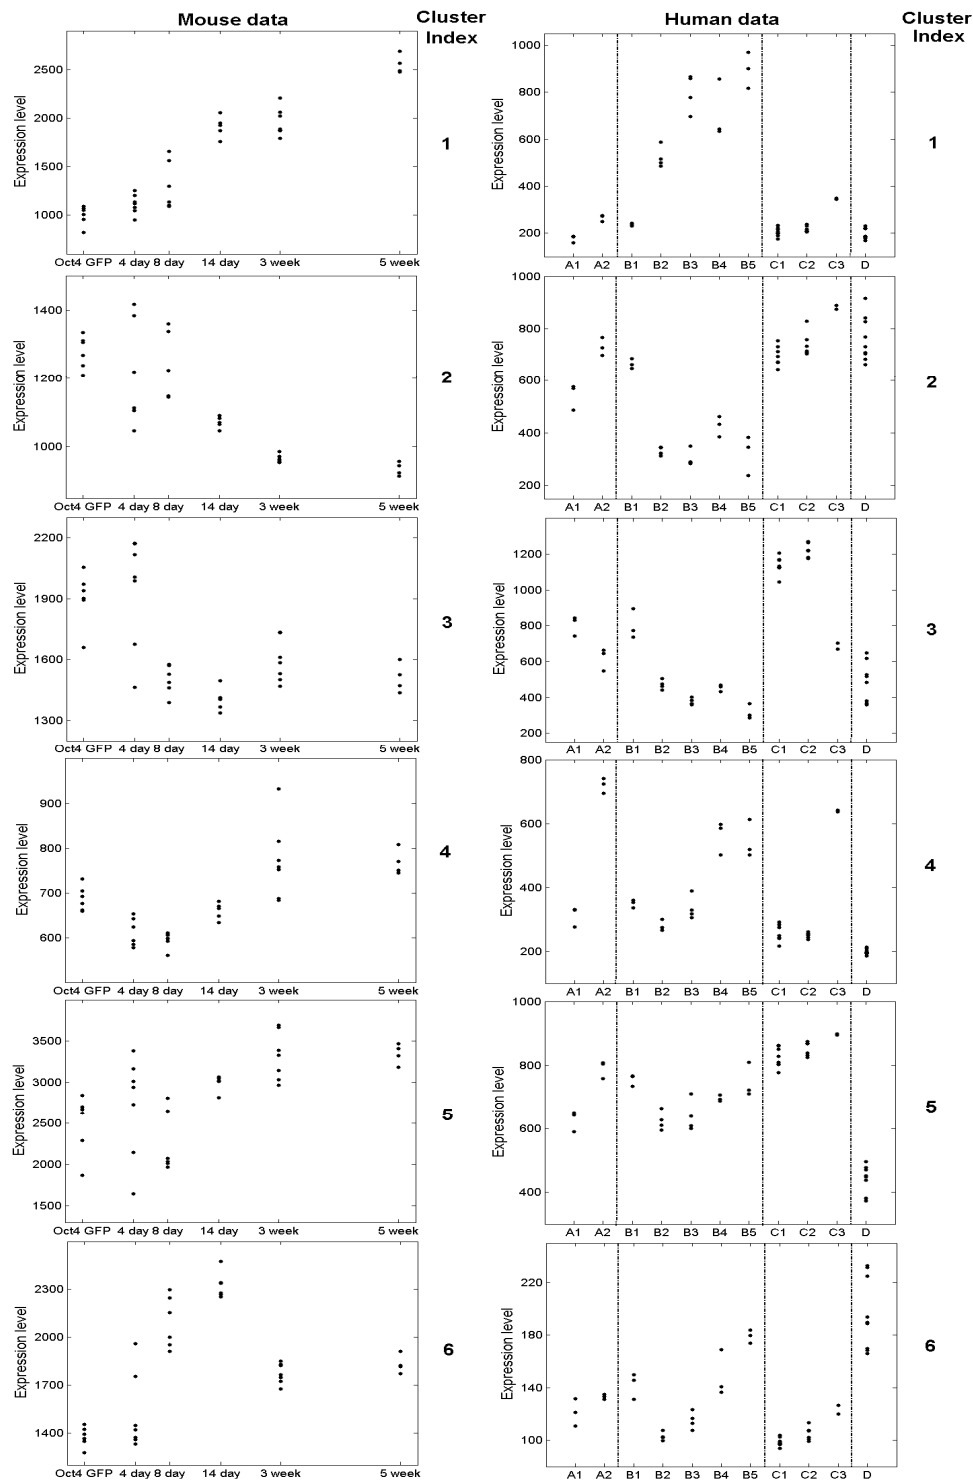

Supplement: Figure S2 — SCSC clusters of mouse and human ES cell differentiation. (A) Sample information for human ES cells. (B) The number of orthologous probe sets in each result cluster, and (C) the corresponding expression patterns of mouse and human clusters. Each dot represents the mean expression of a cluster in a biological replicate. (0.04 MB PDF) [file pcbi.1000707.s006.pdf]
