# Supplementary material for: Modeling Co-Expression across Species for Complex Traits: Insights to the Difference of Human and Mouse Embryonic Stem Cells
Source: PubMed Central journal article supplement (PMC2837392; doi:10.1371/journal.pcbi.1000707), 2010-03-12

**Figure S4. Scheme of computational implementation of the SCSC method.**

The scheme mimics an EM algorithm for clustering one-species data under a Gaussian-mixture model. (Supplementary Document 4)

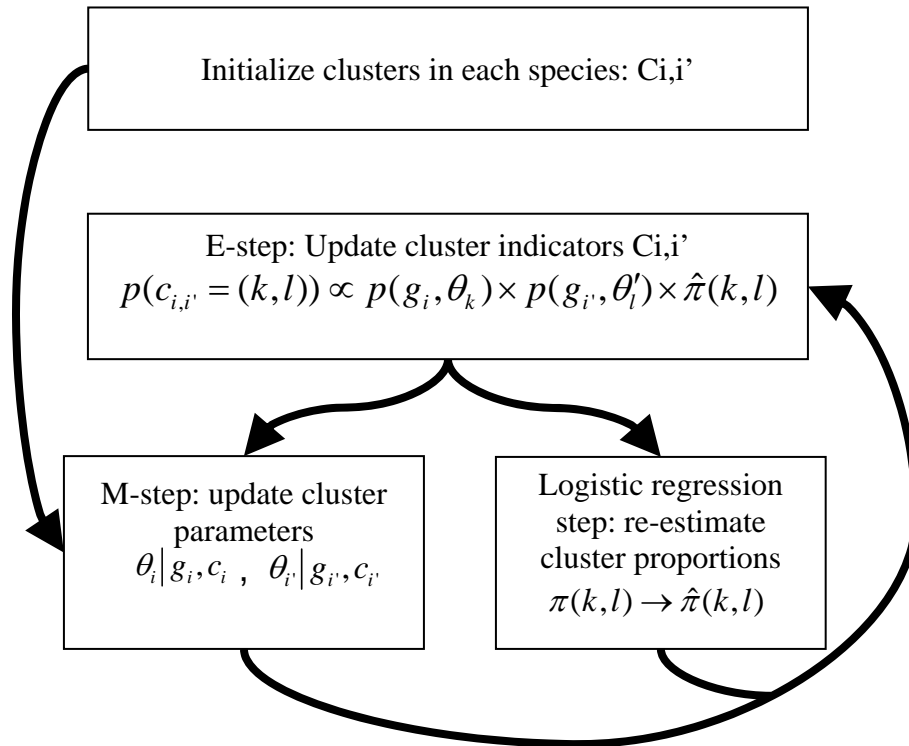

Supplement: pcbi.1000707.s008.pdf [file pcbi.1000707.s008.pdf]
