# Supplementary material for: Modeling Co-Expression across Species for Complex Traits: Insights to the Difference of Human and Mouse Embryonic Stem Cells
Source: PubMed Central journal article supplement (PMC2837392; doi:10.1371/journal.pcbi.1000707), 2010-03-12
Supplement: pcbi.1000707.s009.pdf [file pcbi.1000707.s009.pdf]

## Supplementary Tables

**Table S1: Synthetic datasets.** Cluster number is the number of clusters in the two species. For example, means  $10 \times 10$  10 clusters in both species. Dimension is the number of samples in each species. “# of data points in each cluster” is the number of orthologous genes in each cluster”. “# of scatter data points” is the number of randomly distributed gene pairs that do not belong to any clusters. They represent intrinsic deviation of the transcriptome from a clustering model. The cluster means of dataset 1-5 are randomly generated between 0 and 10. The cluster mean of dataset 6 are generated between 0 and 13. Cluster variation shows the standard deviation used to generate each cluster, with the two numbers representing two standard deviations for each of the two species.

| Dataset | Cluster number | Dimension | # of data points in each cluster | # of scatter data points | Cluster variation (standard deviation) |
|---------|----------------|-----------|----------------------------------|--------------------------|----------------------------------------|
| 1       | $10 \times 10$ | 10        | 200                              | 275                      | [0.8, 0.8]                             |
| 2       | $10 \times 10$ | 10        | 200                              | 275                      | [0.1, 1.4]                             |
| 3       | $10 \times 10$ | 20        | 200                              | 150                      | [0.8, 0.8]                             |
| 4       | $10 \times 10$ | 20        | 200                              | 50                       | [0.8, 0.8]                             |
| 5       | $20 \times 20$ | 10        | 200                              | 150                      | [0.1, 1.4]                             |
| 6       | $4 \times 4$   | 10        | 320                              | 500                      | [1.5, 1.5]                             |
