# Supplementary material for: Modeling Co-Expression across Species for Complex Traits: Insights to the Difference of Human and Mouse Embryonic Stem Cells
Source: PubMed Central journal article supplement (PMC2837392; doi:10.1371/journal.pcbi.1000707), 2010-03-12
Supplement: pcbi.1000707.s010.pdf [file pcbi.1000707.s010.pdf]

**Table S2. Performance evaluation with errors in ortholog map.** 10%-30% of the ortholog mapping in synthetic dataset 1 (Table S1) are randomly permuted to represent the scenarios of errors in ortholog map. SCSC, K-means and DCA were executed on these perturbed datasets, and performance metrics were recorded.

| Error proportion<br>in ortholog map | Center scatter |             |      | Global scatter |             |      | Wrong proportion |             |      |
|-------------------------------------|----------------|-------------|------|----------------|-------------|------|------------------|-------------|------|
|                                     | SCSC           | K-<br>means | DCA  | SCSC           | K-<br>means | DCA  | SCSC             | K-<br>means | DCA  |
| 0%                                  | <b>1.05</b>    | 2.32        | 1.66 | <b>0.36</b>    | 2.07        | 5.60 | <b>0.07</b>      | 0.33        | 0.80 |
| 10%                                 | <b>1.27</b>    | 2.16        | 4.19 | <b>0.48</b>    | 2.50        | 6.72 | <b>0.09</b>      | 0.36        | 0.90 |
| 20%                                 | <b>1.51</b>    | 2.34        | 4.19 | <b>1.04</b>    | 2.84        | 6.72 | <b>0.16</b>      | 0.40        | 0.90 |
| 30%                                 | <b>1.61</b>    | 2.41        | 4.19 | <b>1.24</b>    | 3.08        | 6.72 | <b>0.19</b>      | 0.43        | 0.90 |
