# Supplementary material for: Modeling Co-Expression across Species for Complex Traits: Insights to the Difference of Human and Mouse Embryonic Stem Cells
Source: PLoS Comput Biol. 2010 Mar 12;6(3):e1000707. doi: 10.1371/journal.pcbi.1000707 (PMC2837392; doi:10.1371/journal.pcbi.1000707)
Supplement: Table S3 — SCSC clusters. (A) with conserved upregulation in hES and mES cells, (B) specifically upregulated in mES cells, and (C) specifically upregulated in hES cells. (0.15 MB PDF) [file pcbi.1000707.s011.pdf]

**Table S3: SCSC clusters** (A) with conserved upregulation in hES and mES cells, (B) specifically upregulated in mES cells, and (C) specifically upregulated in hES cells.

| <b>A</b>       |               |                                                                                                   |
|----------------|---------------|---------------------------------------------------------------------------------------------------|
| <b>Cluster</b> | <b>Symbol</b> | <b>Gene description</b>                                                                           |
| (2,3)          | Whsc2         | Wolf-Hirschhorn syndrome candidate 2 (human)                                                      |
| (2,3)          | Raf1          | v-raf-leukemia viral oncogene 1                                                                   |
| (2,3)          | Vsnl1         | visinin-like 1                                                                                    |
| (2,3)          | Vps72         | vacuolar protein sorting 72 (yeast)                                                               |
| (2,3)          | Utf1          | undifferentiated embryonic cell transcription factor 1                                            |
| (2,3)          | Tyro3         | TYRO3 protein tyrosine kinase 3                                                                   |
| (2,3)          | Trim13        | tripartite motif protein 13                                                                       |
| (2,3)          | Tomm7         | translocase of outer mitochondrial membrane 7 homolog (yeast)                                     |
| (2,3)          | Tcea1         | transcription elongation factor A (SII) 1                                                         |
| (2,3)          | Tgif          | TG interacting factor                                                                             |
| (2,3)          | Tera          | teratocarcinoma expressed, serine rich                                                            |
| (2,3)          | Smardc1       | SWI/SNF related, matrix associated, actin dependent regulator of chromatin, subfamily d, member 1 |
| (2,3)          | Suv39h2       | suppressor of variegation 3-9 homolog 2 (Drosophila)                                              |
| (2,3)          | Sub1          | SUB1 homolog (S. cerevisia                                                                        |
| (2,3)          | Spry4         | sprouty homolog 4 (Drosophila)                                                                    |
| (2,3)          | Slc7a8        | solute carrier family 7 (cationic amino acid transporter, y+ system), member 8                    |
| (2,3)          | Sap30         | sin3 associated polypeptide                                                                       |
| (2,3)          | Sh3gl2        | SH3-domain GRB2-like 2                                                                            |
| (2,3)          | Srpk1         | serine/arginine-rich protein specific kinase 1                                                    |
| (2,3)          | Sema6a        | sema domain, transmembrane domain (TM), and cytoplasmic domain, (semaphorin) 6A                   |
| (2,3)          | Sema3a        | sema domain, immunoglobulin domain (Ig), short basic domain, secreted, (semaphorin) 3A            |
| (2,3)          | Rwdd1         | RWD domain containing 1                                                                           |
| (2,3)          | Rbpms         | RNA binding protein gene with multiple splicing                                                   |
| (2,3)          | 4931406I20Rik | RIKEN cDNA 4931406I20 gene                                                                        |
| (2,3)          | Ror1          | receptor tyrosine kinase-like orphan receptor 1                                                   |
| (2,3)          | Ranbp1        | RAN binding protein 1                                                                             |
| (2,3)          | Rabggtb       | RAB geranylgeranyl transferase, b subunit                                                         |
| (2,3)          | Pus1          | pseudouridine synthase 1                                                                          |
| (2,3)          | Pim2          | proviral integration site 2                                                                       |
| (2,3)          | Col9a3        | procollagen, type IX, alpha 3                                                                     |
| (2,3)          | Pou2f1        | POU domain, class 2, transcription factor 1                                                       |
| (2,3)          | Pole3         | polymerase (DNA directed), epsilon 3 (p17 subunit)                                                |
| (2,3)          | Pttg1         | pituitary tumor-transforming 1                                                                    |
| (2,3)          | Prps1         | phosphoribosyl pyrophosphate synthetase 1                                                         |
| (2,3)          | Pltp          | phospholipid transfer protein                                                                     |
| (2,3)          | Pck2          | phosphoenolpyruvate carboxykinase 2 (mitochondrial)                                               |
| (2,3)          | Pdlim1        | PDZ and LIM domain 1 (elfin)                                                                      |
| (2,3)          | Nup62         | nucleoporin 62                                                                                    |

|       |          |                                                                 |
|-------|----------|-----------------------------------------------------------------|
| (2,3) | Nfyb     | nuclear transcription factor-Y beta                             |
| (2,3) | Nanog    | Nanog homeobox                                                  |
| (2,3) | Ndufb5   | NADH dehydrogenase (ubiquinone) 1 beta subcomplex, 5            |
| (2,3) | Mtmr9    | myotubularin related protein 9                                  |
| (2,3) | Mybl2    | myeloblastosis oncogene-like 2                                  |
| (2,3) | Mrps28   | mitochondrial ribosomal protein S28                             |
| (2,3) | Mrpl34   | mitochondrial ribosomal protein L34                             |
| (2,3) | Mcm10    | minichromosome maintenance deficient 10 (S. cerevisiae)         |
| (2,3) | Mlx      | MAX-like protein X                                              |
| (2,3) | Mad2l1bp | MAD2L1 binding protein                                          |
| (2,3) | Lrig1    | leucine-rich repeats and immunoglobulin-like domains 1          |
| (2,3) | Lmnb2    | lamin B2                                                        |
| (2,3) | Ldhb     | lactate dehydrogenase B                                         |
| (2,3) | Jarid2   | jumonji, AT rich interactive domain 2                           |
| (2,3) | Ifrd2    | interferon-related developmental regulator 2                    |
| (2,3) | Imp3     | IMP3, U3 small nucleolar ribonucleoprotein, homolog (yeast)     |
| (2,3) | Hesx1    | homeo box gene expressed in ES cells                            |
| (2,3) | Hmga1    | high mobility group AT-hook 1                                   |
| (2,3) | Hnrpl    | heterogeneous nuclear ribonucleoprotein L                       |
| (2,3) | Hsp90aa1 | heat shock protein 90kDa alpha (cytosolic), class A member 1    |
| (2,3) | Hrk      | harakiri, BCL2 interacting protein (contains only BH3 domain)   |
| (2,3) | Grhpr    | glyoxylate reductase/hydroxypyruvate reductase                  |
| (2,3) | Glo1     | glyoxalase 1                                                    |
| (2,3) | Gfpt2    | glutamine fructose-6-phosphate transaminase 2                   |
| (2,3) | Gnpda1   | glucosamine-6-phosphate deaminase 1                             |
| (2,3) | Gm288    | gene model 288, (NCBI)                                          |
| (2,3) | Gal      | galanin                                                         |
| (2,3) | Fzd7     | frizzled homolog 7 (Drosophila)                                 |
| (2,3) | Fkbp4    | FK506 binding protein 4                                         |
| (2,3) | Fgf2     | fibroblast growth factor 2                                      |
| (2,3) | Daxx     | Fas death domain-associated protein                             |
| (2,3) | Eif3s7   | eukaryotic translation initiation factor 3, subunit 7 (zeta)    |
| (2,3) | Eif2c2   | eukaryotic translation initiation factor 2C, 2                  |
| (2,3) | Dscr2    | Down syndrome critical region homolog 2 (human)                 |
| (2,3) | Dnaja3   | DnaJ (Hsp40) homolog, subfamily A, member 3                     |
| (2,3) | Dnmt1    | DNA methyltransferase (cytosine-5) 1                            |
| (2,3) | Cox7c    | cytochrome c oxidase, subunit VIIc                              |
| (2,3) | Ccbl2    | cysteine conjugate-beta lyase 2                                 |
| (2,3) | Cutl2    | cut-like 2 (Drosophila)                                         |
| (2,3) | Crsp2    | Cofactor required for Sp1 transcriptional activation, subunit 2 |
| (2,3) | Cstf1    | cleavage stimulation factor, 3' pre-RNA, subunit 1              |
| (2,3) | Cldn3    | claudin 3                                                       |
| (2,3) | Chga     | chromogranin A                                                  |
| (2,3) | Cdk2ap1  | CDK2 (cyclin-dependent kinase 2)-associated protein 1           |
| (2,3) | Csnk2b   | casein kinase 2, beta polypeptide                               |

|       |               |                                                                                 |
|-------|---------------|---------------------------------------------------------------------------------|
| (2,3) | Bub1          | budding uninhibited by benzimidazoles 1 homolog (S. cerevisiae)                 |
| (2,3) | Bckdhh        | branched chain ketoacid dehydrogenase E1, beta polypeptide                      |
| (2,3) | Aurka         | aurora kinase A                                                                 |
| (2,3) | Asrgl1        | asparaginase like 1                                                             |
| (2,3) | Aass          | aminoadipate-semialdehyde synthase                                              |
| (2,3) | Aldh18a1      | aldehyde dehydrogenase 18 family, member A1                                     |
| (2,3) | Ak2           | adenylate kinase 2                                                              |
| (2,3) | Acot8         | acyl-CoA thioesterase 8                                                         |
| (2,3) | Acot7         | acyl-CoA thioesterase 7                                                         |
| (2,3) | Ascc1         | activating signal cointegrator 1 complex subunit 1                              |
| (2,3) | Bmpr1b        | bone morphogenetic protein receptor, type 1B                                    |
| (3,3) | Zfp64         | zinc finger protein 64                                                          |
| (3,3) | Xrcc5         | X-ray repair complementing defective repair in Chinese hamster cells 5          |
| (3,3) | Mycn          | v-myc myelocytomatosis viral related oncogene, neuroblastoma derived (avian)    |
| (3,3) | Utp14a        | UTP14, U3 small nucleolar ribonucleoprotein, homolog A (yeast)                  |
| (3,3) | Uck2          | uridine-cytidine kinase 2                                                       |
| (3,3) | Uble1b        | ubiquitin-like 1 (sentrin) activating enzyme E1B                                |
| (3,3) | Ubap2         | ubiquitin-associated protein 2                                                  |
| (3,3) | Usp5          | ubiquitin specific peptidase 5 (isopeptidase T)                                 |
| (3,3) | Tnfsf11       | tumor necrosis factor (ligand) superfamily, member 11                           |
| (3,3) | Tbca          | tubulin cofactor a                                                              |
| (3,3) | Ttk           | Ttk protein kinase                                                              |
| (3,3) | Tsr1          | TSR1, 20S rRNA accumulation, homolog (yeast)                                    |
| (3,3) | Tnpo3         | transportin 3                                                                   |
| (3,3) | Tnpo1         | transportin 1                                                                   |
| (3,3) | Tomm20        | translocase of outer mitochondrial membrane 20 homolog (yeast)                  |
| (3,3) | Timm8a1       | translocase of inner mitochondrial membrane 8 homolog a1 (yeast)                |
| (3,3) | Tacc3         | transforming, acidic coiled-coil containing protein 3                           |
| (3,3) | Tars          | threonyl-tRNA synthetase                                                        |
| (3,3) | Txn1l         | thioredoxin-like 1                                                              |
| (3,3) | Terf1         | telomeric repeat binding factor 1                                               |
| (3,3) | Taf1c         | TATA box binding protein (Tbp)-associated factor, RNA polymerase I, C           |
| (3,3) | Supv3l1       | suppressor of var1, 3-like 1 (S. cerevisiae)                                    |
| (3,3) | Supt4h1       | suppressor of Ty 4 homolog 1 (S. cerevisiae)                                    |
| (3,3) | Sox2          | SRY-box containing gene 2                                                       |
| (3,3) | Sms           | spermine synthase                                                               |
| (3,3) | Slc7a11       | solute carrier family 7 (cationic amino acid transporter, y+ system), member 11 |
| (3,3) | Slc29a1       | solute carrier family 29 (nucleoside transporters), member 1                    |
| (3,3) | Ahcy          | S-adenosylhomocysteine hydrolase                                                |
| (3,3) | Ruvb1l        | RuvB-like protein 1                                                             |
| (3,3) | Rrn3          | RRN3 RNA polymerase I transcription factor homolog (yeast)                      |
| (3,3) | Rbm4          | RNA binding motif protein 4                                                     |
| (3,3) | Rbm14         | RNA binding motif protein 14                                                    |
| (3,3) | Rnf138        | ring finger protein 138                                                         |
| (3,3) | 5730410I19Rik | RIKEN cDNA 5730410I19 gene                                                      |

|       |               |                                                            |
|-------|---------------|------------------------------------------------------------|
| (3,3) | 2810422O20Rik | RIKEN cDNA 2810422O20 gene                                 |
| (3,3) | 2600005C20Rik | RIKEN cDNA 2600005C20 gene                                 |
| (3,3) | 2310057D15Rik | RIKEN cDNA 2310057D15 gene                                 |
| (3,3) | 2010309E21Rik | RIKEN cDNA 2010309E21 gene                                 |
| (3,3) | Rpe           | ribulose-5-phosphate-3-epimerase                           |
| (3,3) | Ran           | RAN, member RAS oncogene family                            |
| (3,3) | Rad51         | RAD51 homolog (S. cerevisiae)                              |
| (3,3) | Ppa1          | pyrophosphatase (inorganic) 1                              |
| (3,3) | Prkdc         | protein kinase, DNA activated, catalytic polypeptide       |
| (3,3) | Prep          | prolyl endopeptidase                                       |
| (3,3) | Pa2g4         | proliferation-associated 2G4                               |
| (3,3) | Pou5f1        | POU domain, class 5, transcription factor 1                |
| (3,3) | Pola1         | polymerase (DNA directed), alpha 1                         |
| (3,3) | Phc1          | polyhomeotic-like 1 (Drosophila)                           |
| (3,3) | Pabpc4        | poly A binding protein, cytoplasmic 4                      |
| (3,3) | Psat1         | phosphoserine aminotransferase 1                           |
| (3,3) | Ppat          | phosphoribosyl pyrophosphate amidotransferase              |
| (3,3) | Orc51         | origin recognition complex, subunit 5-like (S. cerevisiae) |
| (3,3) | Nup93         | nucleoporin 93                                             |
| (3,3) | Nup107        | nucleoporin 107                                            |
| (3,3) | Nsd1          | nuclear receptor-binding SET-domain protein 1              |
| (3,3) | Myst2         | MYST histone acetyltransferase 2                           |
| (3,3) | Msh2          | mutS homolog 2 (E. coli)                                   |
| (3,3) | Mtf2          | metal response element binding transcription factor 2      |
| (3,3) | Lrpprc        | leucine-rich PPR-motif containing                          |
| (3,3) | Lmnb1         | lamin B1                                                   |
| (3,3) | Kpna1         | karyopherin (importin) alpha 1                             |
| (3,3) | Itpk1         | inositol 1,3,4-triphosphate 5/6 kinase                     |
| (3,3) | Hprt1         | hypoxanthine guanine phosphoribosyl transferase 1          |
| (3,3) | Hus1          | Hus1 homolog (S. pombe)                                    |
| (3,3) | Hip2          | huntingtin interacting protein 2                           |
| (3,3) | Hcfc1         | host cell factor C1                                        |
| (3,3) | Hint1         | histidine triad nucleotide binding protein 1               |
| (3,3) | Hspa9a        | heat shock protein 9A                                      |
| (3,3) | Gmfb          | glia maturation factor, beta                               |
| (3,3) | Gspt1         | G1 to S phase transition 1                                 |
| (3,3) | Fkbp3         | FK506 binding protein 3                                    |
| (3,3) | Fem1b         | feminization 1 homolog b (C. elegans)                      |
| (3,3) | Fastkd5       | FAST kinase domains 5                                      |
| (3,3) | Faf1          | Fas-associated factor 1                                    |
| (3,3) | C80913        | expressed sequence C80913                                  |
| (3,3) | Etv4          | ets variant gene 4 (E1A enhancer binding protein, E1AF)    |
| (3,3) | Epb4.112      | Erythrocyte protein band 4.1-like 2                        |
| (3,3) | Eed           | embryonic ectoderm development                             |
| (3,3) | Ect2          | ect2 oncogene                                              |

|       |             |                                                                                         |
|-------|-------------|-----------------------------------------------------------------------------------------|
| (3,3) | E2f8        | E2F transcription factor 8                                                              |
| (3,3) | D19Bwg1357e | DNA segment, Chr 19, Brigham & Women's Genetics 1357 expressed                          |
| (3,3) | D15Ertd682e | DNA segment, Chr 15, ERATO Doi 682, expressed                                           |
| (3,3) | D14Ertd436e | DNA segment, Chr 14, ERATO Doi 436, expressed                                           |
| (3,3) | Ga17        | dendritic cell protein GA17                                                             |
| (3,3) | Ddx54       | DEAD (Asp-Glu-Ala-Asp) box polypeptide 54                                               |
| (3,3) | Ddx27       | DEAD (Asp-Glu-Ala-Asp) box polypeptide 27                                               |
| (3,3) | Ddx18       | DEAD (Asp-Glu-Ala-Asp) box polypeptide 18                                               |
| (3,3) | Ckap2       | cytoskeleton associated protein 2                                                       |
| (3,3) | Ctbp2       | C-terminal binding protein 2                                                            |
| (3,3) | Cops8       | COP9 (constitutive photomorphogenic) homolog, subunit 8 ( <i>Arabidopsis thaliana</i> ) |
| (3,3) | Coil        | coilin                                                                                  |
| (3,3) | Chaf1b      | chromatin assembly factor 1, subunit B (p60)                                            |
| (3,3) | Cdc6        | cell division cycle 6 homolog ( <i>S. cerevisiae</i> )                                  |
| (3,3) | Cnot7       | CCR4-NOT transcription complex, subunit 7                                               |
| (3,3) | Cacybp      | calcyclin binding protein                                                               |
| (3,3) | Bard1       | BRCA1 associated RING domain 1                                                          |
| (3,3) | Bet1        | blocked early in transport 1 homolog ( <i>S. cerevisiae</i> )                           |
| (3,3) | Belaf1      | BCL2-associated transcription factor 1                                                  |
| (3,3) | Btf3        | basic transcription factor 3                                                            |
| (3,3) | Dars        | aspartyl-tRNA synthetase                                                                |
| (3,3) | Asns        | asparagine synthetase                                                                   |
| (3,3) | Asf1a       | ASF1 anti-silencing function 1 homolog A ( <i>S. cerevisiae</i> )                       |
| (3,3) | Ars2        | arsenate resistance protein 2                                                           |
| (3,3) | Actr6       | ARP6 actin-related protein 6 homolog (yeast)                                            |
| (3,3) | Aqr         | aquarius                                                                                |
| (3,3) | Apex1       | apurinic/apyrimidinic endonuclease 1                                                    |
| (3,3) | Akp2        | alkaline phosphatase 2, liver                                                           |
| (3,3) | Akap12      | A kinase (PRKA) anchor protein (gravin) 12                                              |
| (3,3) | Dppa4       | developmental pluripotency associated 4                                                 |
| (3,3) | Tdgf1       | teratocarcinoma-derived growth factor                                                   |

---

# C

| Cluster | Symbol   | Gene description                                                            |
|---------|----------|-----------------------------------------------------------------------------|
| (1,3)   | Twsg1    | twisted gastrulation homolog 1 (Drosophila)                                 |
| (1,3)   | Trove2   | TROVE domain family, member 2                                               |
| (1,3)   | Tmem70   | transmembrane protein 70                                                    |
| (1,3)   | Tle1     | transducin-like enhancer of split 1, homolog of Drosophila E(spl)           |
| (1,3)   | Tcfcp2   | transcription factor CP2                                                    |
| (1,3)   | Tcf4     | transcription factor 4                                                      |
| (1,3)   | Top2b    | topoisomerase (DNA) II beta                                                 |
| (1,3)   | Tmpo     | thymopoietin                                                                |
| (1,3)   | Spast    | spastin                                                                     |
| (1,3)   | Slc30a5  | solute carrier family 30 (zinc transporter), member 5                       |
| (1,3)   | Stk39    | serine/threonine kinase 39, STE20/SPS1 homolog (yeast)                      |
| (1,3)   | Sec63    | SEC63-like (S. cerevisiae)                                                  |
| (1,3)   | Sar1a    | SAR1 gene homolog A (S. cerevisiae)                                         |
| (1,3)   | Robo1    | roundabout homolog 1 (Drosophila)                                           |
| (1,3)   | Rprm     | reprimin, TP53 dependent G2 arrest mediator candidate                       |
| (1,3)   | Rit2     | Ras-like without CAAX 2                                                     |
| (1,3)   | Rab28    | RAB28, member RAS oncogene family                                           |
| (1,3)   | Rabgap11 | RAB GTPase activating protein 1-like                                        |
| (1,3)   | Prkcbp1  | protein kinase C binding protein 1                                          |
| (1,3)   | Prepl    | prolyl endopeptidase-like                                                   |
| (1,3)   | Pbx3     | pre B-cell leukemia transcription factor 3                                  |
| (1,3)   | Kcnd2    | potassium voltage-gated channel, Shal-related family, member 2              |
| (1,3)   | Plekhc1  | pleckstrin homology domain containing, family C (with FERM domain) member 1 |
| (1,3)   | Pafah1b1 | platelet-activating factor acetylhydrolase, isoform 1b, beta1 subunit       |
| (1,3)   | Peg3     | paternally expressed 3                                                      |
| (1,3)   | Nfe2l3   | nuclear factor, erythroid derived 2, like 3                                 |
| (1,3)   | Npy1r    | neuropeptide Y receptor Y1                                                  |
| (1,3)   | Mpdz     | multiple PDZ domain protein                                                 |
| (1,3)   | Mapre1   | microtubule-associated protein, RP/EB family, member 1                      |
| (1,3)   | Mest     | mesoderm specific transcript                                                |
| (1,3)   | Magel2   | melanoma antigen, family L, 2                                               |
| (1,3)   | Man2a1   | mannosidase 2, alpha 1                                                      |
| (1,3)   | Large    | like-glycosyltransferase                                                    |
| (1,3)   | Kif1a    | kinesin family member 1A                                                    |
| (1,3)   | Klhl7    | kelch-like 7 (Drosophila)                                                   |
| (1,3)   | Itsn1    | intersectin 1 (SH3 domain protein 1A)                                       |
| (1,3)   | Gap43    | growth associated protein 43                                                |
| (1,3)   | Gpm6b    | glycoprotein m6b                                                            |
| (1,3)   | Flt1     | FMS-like tyrosine kinase 1                                                  |
| (1,3)   | AW146242 | expressed sequence AW146242                                                 |
| (1,3)   | Enpp1    | ectonucleotide pyrophosphatase/phosphodiesterase 1                          |
| (1,3)   | Dnm1     | dynamitin 1                                                                 |

|       |          |                                                                                                |
|-------|----------|------------------------------------------------------------------------------------------------|
| (1,3) | Dpm1     | dolichol-phosphate (beta-D) mannosyltransferase 1                                              |
| (1,3) | D0H4S114 | DNA segment, human D4S114                                                                      |
| (1,3) | Dpysl3   | dihydropyrimidinase-like 3                                                                     |
| (1,3) | Cri1     | CREBBP/EP300 inhibitory protein 1                                                              |
| (1,3) | Clu      | clusterin                                                                                      |
| (1,3) | Cstf2t   | cleavage stimulation factor, 3' pre-RNA subunit 2, tau                                         |
| (1,3) | Clic4    | chloride intracellular channel 4 (mitochondrial)                                               |
| (1,3) | Cenpe    | centromere protein E                                                                           |
| (1,3) | Centg2   | centaurin, gamma 2                                                                             |
| (1,3) | Cdc16    | CDC16 cell division cycle 16 homolog (S. cerevisiae)                                           |
| (1,3) | Csnk1d   | casein kinase 1, delta                                                                         |
| (1,3) | Alg5     | asparagine-linked glycosylation 5 homolog (yeast, dolichyl-phosphate beta-glucosyltransferase) |
| (1,3) | Armex2   | armadillo repeat containing, X-linked 2                                                        |
| (1,3) | Rere     | arginine glutamic acid dipeptide (RE) repeats                                                  |
| (1,3) | Ank3     | ankyrin 3, epithelial                                                                          |
| (1,3) | Appbp1   | amyloid beta precursor protein binding protein 1                                               |
| (1,3) | Pdpk1    | 3-phosphoinositide dependent protein kinase-1                                                  |
| (4,3) | Wrn      | Werner syndrome homolog (human)                                                                |
| (4,3) | Umps     | uridine monophosphate synthetase                                                               |
| (4,3) | Unc13b   | unc-13 homolog B (C. elegans)                                                                  |
| (4,3) | Tbl1x    | Transducin (beta)-like 1 X-linked                                                              |
| (4,3) | Tfam     | transcription factor A, mitochondrial                                                          |
| (4,3) | Tcf7l2   | transcription factor 7-like 2, T-cell specific, HMG-box                                        |
| (4,3) | Taf1b    | TATA box binding protein (Tbp)-associated factor, RNA polymerase I, B                          |
| (4,3) | Taf6     | TAF6 RNA polymerase II, TATA box binding protein (TBP)-associated factor                       |
| (4,3) | Syt1     | synaptotagmin I                                                                                |
| (4,3) | Stc1     | stanniocalcin 1                                                                                |
| (4,3) | Sart3    | squamous cell carcinoma antigen recognized by T-cells 3                                        |
| (4,3) | Srp54    | signal recognition particle 54                                                                 |
| (4,3) | Rbm9     | RNA binding motif protein 9                                                                    |
| (4,3) | Rbm15    | RNA binding motif protein 15                                                                   |
| (4,3) | Ptpn11   | protein tyrosine phosphatase, non-receptor type 11                                             |
| (4,3) | Pbx1     | pre B-cell leukemia transcription factor 1                                                     |
| (4,3) | Kcnq2    | potassium voltage-gated channel, subfamily Q, member 2                                         |
| (4,3) | Pctk3    | PCTAIRE-motif protein kinase 3                                                                 |
| (4,3) | Nell2    | NEL-like 2 (chicken)                                                                           |
| (4,3) | Nrd1     | nardilysin, N-arginine dibasic convertase, NRD convertase 1                                    |
| (4,3) | Gnptab   | N-acetylglucosamine-1-phosphate transferase, alpha and beta subunits                           |
| (4,3) | Ms4a2    | membrane-spanning 4-domains, subfamily A, member 2                                             |
| (4,3) | Lrp6     | low density lipoprotein receptor-related protein 6                                             |
| (4,3) | Ldb2     | LIM domain binding 2                                                                           |
| (4,3) | Larp7    | La ribonucleoprotein domain family, member 7                                                   |
| (4,3) | Indo     | indoleamine-pyrrole 2,3 dioxygenase                                                            |
| (4,3) | Fgfr2    | fibroblast growth factor receptor 2                                                            |

|       |               |                                                                                                   |
|-------|---------------|---------------------------------------------------------------------------------------------------|
| (4,3) | Epb4.111      | erythrocyte protein band 4.1-like 1                                                               |
| (4,3) | D2Wsu81e      | DNA segment, Chr 2, Wayne State University 81, expressed                                          |
| (4,3) | Cxadr         | coxsackievirus and adenovirus receptor                                                            |
| (4,3) | Bmp4          | bone morphogenetic protein 4                                                                      |
| (4,3) | Auh           | AU RNA binding protein/enoyl-coenzyme A hydratase                                                 |
| (4,3) | Aldh1a2       | aldehyde dehydrogenase family 1, subfamily A2                                                     |
| (4,3) | Akap1         | A kinase (PRKA) anchor protein 1                                                                  |
| (5,3) | Zzz3          | zinc finger, ZZ domain containing 3                                                               |
| (5,3) | Zfml          | zinc finger, matrin-like                                                                          |
| (5,3) | Zfp281        | zinc finger protein 281                                                                           |
| (5,3) | Kras          | v-Ki-ras2 Kirsten rat sarcoma viral oncogene homolog                                              |
| (5,3) | Vcl           | vinculin                                                                                          |
| (5,3) | Vdp           | vesicle docking protein                                                                           |
| (5,3) | Vrk1          | vaccinia related kinase 1                                                                         |
| (5,3) | Ugdh          | UDP-glucose dehydrogenase                                                                         |
| (5,3) | Ube2g1        | ubiquitin-conjugating enzyme E2G 1 (UBC7 homolog, C. elegans)                                     |
| (5,3) | Usp1          | ubiquitin specific peptidase 1                                                                    |
| (5,3) | ---           | U63720:Mus musculus CPP32 apoptotic protease mRNA                                                 |
| (5,3) | Tnfrsf11a     | tumor necrosis factor receptor superfamily, member 11a                                            |
| (5,3) | Tmeff1        | transmembrane protein with EGF-like and two follistatin-like domains 1                            |
| (5,3) | Trpc1         | transient receptor potential cation channel, subfamily C, member 1                                |
| (5,3) | Tfrc          | transferrin receptor                                                                              |
| (5,3) | Tceb1         | transcription elongation factor B (SIII), polypeptide 1                                           |
| (5,3) | Topbp1        | topoisomerase (DNA) II beta binding protein                                                       |
| (5,3) | Tbpl1         | TATA box binding protein-like 1                                                                   |
| (5,3) | Tardbp        | TAR DNA binding protein                                                                           |
| (5,3) | Syncrin       | synaptotagmin binding, cytoplasmic RNA interacting protein                                        |
| (5,3) | Smarca5       | SWI/SNF related, matrix associated, actin dependent regulator of chromatin, subfamily a, member 5 |
| (5,3) | Smc4          | structural maintenance of chromosomes 4                                                           |
| (5,3) | Smc2          | structural maintenance of chromosomes 2                                                           |
| (5,3) | Sfrs3         | splicing factor, arginine/serine-rich 3 (SRp20)                                                   |
| (5,3) | Sfrs2         | splicing factor, arginine/serine-rich 2 (SC-35)                                                   |
| (5,3) | Slc33a1       | solute carrier family 33 (acetyl-CoA transporter), member 1                                       |
| (5,3) | Sumo1         | SMT3 suppressor of mif two 3 homolog 1 (yeast)                                                    |
| (5,3) | Ssb           | Sjogren syndrome antigen B                                                                        |
| (5,3) | Sap18         | Sin3-associated polypeptide 18                                                                    |
| (5,3) | Serbp1        | Serpine1 mRNA binding protein 1                                                                   |
| (5,3) | Rrs1          | RRS1 ribosome biogenesis regulator homolog (S. cerevisiae)                                        |
| (5,3) | 4921531G14Rik | RIKEN cDNA 4921531G14 gene                                                                        |
| (5,3) | 3300001P08Rik | RIKEN cDNA 3300001P08 gene                                                                        |
| (5,3) | 2810405J04Rik | RIKEN cDNA 2810405J04 gene                                                                        |
| (5,3) | Rpn2          | ribophorin II                                                                                     |
| (5,3) | Rcctb1        | regulator of chromosome condensation (RCC1) and BTB (POZ) domain containing protein 1             |
| (5,3) | R3hdm1        | R3H domain 1 (binds single-stranded nucleic acids)                                                |

|       |          |                                                                     |
|-------|----------|---------------------------------------------------------------------|
| (5,3) | Qk       | quaking                                                             |
| (5,3) | Ptk2     | PTK2 protein tyrosine kinase 2                                      |
| (5,3) | Prpf4b   | PRP4 pre-mRNA processing factor 4 homolog B (yeast)                 |
| (5,3) | Ptprk    | protein tyrosine phosphatase, receptor type, K                      |
| (5,3) | Ptprg    | protein tyrosine phosphatase, receptor type, G                      |
| (5,3) | Ppm1b    | protein phosphatase 1B, magnesium dependent, beta isoform           |
| (5,3) | Ppp1cc   | protein phosphatase 1, catalytic subunit, gamma isoform             |
| (5,3) | Psme4    | proteasome (prosome, macropain) activator subunit 4                 |
| (5,3) | Pgrmc1   | progesterone receptor membrane component 1                          |
| (5,3) | Parg     | poly (ADP-ribose) glycohydrolase                                    |
| (5,3) | Pkp4     | plakophilin 4                                                       |
| (5,3) | Prdx3    | peroxiredoxin 3                                                     |
| (5,3) | Ppid     | peptidylprolyl isomerase D (cyclophilin D)                          |
| (5,3) | Ptch1    | patched homolog 1                                                   |
| (5,3) | Otud4    | OTU domain containing 4                                             |
| (5,3) | Nsbp1    | nucleosome binding protein 1                                        |
| (5,3) | Nup50    | nucleoporin 50                                                      |
| (5,3) | Nucks1   | nuclear casein kinase and cyclin-dependent kinase substrate 1       |
| (5,3) | Ncbp2    | nuclear cap binding protein subunit 2                               |
| (5,3) | Narg1    | NMDA receptor-regulated gene 1                                      |
| (5,3) | Nlk      | nemo like kinase                                                    |
| (5,3) | Ndufs1   | NADH dehydrogenase (ubiquinone) Fe-S protein 1                      |
| (5,3) | Map3k7   | mitogen activated protein kinase kinase kinase 7                    |
| (5,3) | Mtif2    | mitochondrial translational initiation factor 2                     |
| (5,3) | Metap1   | methionyl aminopeptidase 1                                          |
| (5,3) | Matr3    | matrin 3                                                            |
| (5,3) | Smad2    | MAD homolog 2 (Drosophila)                                          |
| (5,3) | Kif2a    | Kinesin family member 2A                                            |
| (5,3) | Khdrbs1  | KH domain containing, RNA binding, signal transduction associated 1 |
| (5,3) | Kpnb1    | karyopherin (importin) beta 1                                       |
| (5,3) | Jarid1b  | jumonji, AT rich interactive domain 1B (Rbp2 like)                  |
| (5,3) | Iars2    | isoleucine-tRNA synthetase 2, mitochondrial                         |
| (5,3) | Impact   | imprinted and ancient                                               |
| (5,3) | Htatsf1  | HIV TAT specific factor 1                                           |
| (5,3) | Hmgb1    | high mobility group box 1                                           |
| (5,3) | Hnrpr    | heterogeneous nuclear ribonucleoprotein R                           |
| (5,3) | Hnrpa2b1 | heterogeneous nuclear ribonucleoprotein A2/B1                       |
| (5,3) | Hs2st1   | heparan sulfate 2-O-sulfotransferase 1                              |
| (5,3) | Hspa4    | heat shock protein 4                                                |
| (5,3) | Gatad2a  | GATA zinc finger domain containing 2A                               |
| (5,3) | Gja1     | gap junction membrane channel protein alpha 1                       |
| (5,3) | Fzd3     | frizzled homolog 3 (Drosophila)                                     |
| (5,3) | Etv1     | ets variant gene 1                                                  |
| (5,3) | Ei24     | etoposide induced 2.4 mRNA                                          |
| (5,3) | Ergic2   | ERGIC and golgi 2                                                   |

|       |               |                                                                                     |
|-------|---------------|-------------------------------------------------------------------------------------|
| (5,3) | Eny2          | enhancer of yellow 2 homolog (Drosophila)                                           |
| (5,3) | E2f1          | E2F transcription factor 1                                                          |
| (5,3) | Dtl           | denticless homolog (Drosophila)                                                     |
| (5,3) | Dek           | DEK oncogene (DNA binding)                                                          |
| (5,3) | Dhx9          | DEAH (Asp-Glu-Ala-His) box polypeptide 9                                            |
| (5,3) | Cul3          | cullin 3                                                                            |
| (5,3) | Cul1          | cullin 1                                                                            |
| (5,3) | Cltc          | clathrin, heavy polypeptide (Hc)                                                    |
| (5,3) | Chd4          | chromodomain helicase DNA binding protein 4                                         |
| (5,3) | Cct8          | chaperonin subunit 8 (theta)                                                        |
| (5,3) | Cetn3         | centrin 3                                                                           |
| (5,3) | Cnbp          | cellular nucleic acid binding protein                                               |
| (5,3) | Cdc7          | cell division cycle 7 (S. cerevisiae)                                               |
| (5,3) | Casp8ap2      | caspase 8 associated protein 2                                                      |
| (5,3) | Csnk2a1       | casein kinase 2, alpha 1 polypeptide                                                |
| (5,3) | Atg12         | autophagy-related 12 (yeast)                                                        |
| (5,3) | Angel2        | angel homolog 2 (Drosophila)                                                        |
| (5,3) | Adss          | adenylosuccinate synthetase, non muscle                                             |
| (5,3) | Adecy2        | adenylate cyclase 2                                                                 |
| (6,3) | Zwint         | ZW10 interactor                                                                     |
| (6,3) | Zdhhc6        | zinc finger, DHHC domain containing 6                                               |
| (6,3) | Zic3          | zinc finger protein of the cerebellum 3                                             |
| (6,3) | Zfp143        | zinc finger protein 143                                                             |
| (6,3) | Yy1           | YY1 transcription factor                                                            |
| (6,3) | Galnt11       | UDP-N-acetyl-alpha-D-galactosamine:polypeptide N-acetylgalactosaminyltransferase 11 |
| (6,3) | Trp53bp1      | transformation related protein 53 binding protein 1                                 |
| (6,3) | Tgif2         | TGFB-induced factor 2                                                               |
| (6,3) | Tgds          | TDP-glucose 4,6-dehydratase                                                         |
| (6,3) | Tbp           | TATA box binding protein                                                            |
| (6,3) | Sdf2          | stromal cell derived factor 2                                                       |
| (6,3) | Stc2          | stanniocalcin 2                                                                     |
| (6,3) | Sfrs9         | splicing factor, arginine/serine rich 9                                             |
| (6,3) | Sri           | sorcin                                                                              |
| (6,3) | Son           | Son cell proliferation protein                                                      |
| (6,3) | Slc30a9       | solute carrier family 30 (zinc transporter), member 9                               |
| (6,3) | Slc16a1       | solute carrier family 16 (monocarboxylic acid transporters), member 1               |
| (6,3) | Rnf5          | ring finger protein 5                                                               |
| (6,3) | 9130211I03Rik | RIKEN cDNA 9130211I03 gene                                                          |
| (6,3) | 1600012H06Rik | RIKEN cDNA 1600012H06 gene                                                          |
| (6,3) | Ppp2r5e       | Protein phosphatase 2, regulatory subunit B (B56), epsilon isoform                  |
| (6,3) | Podxl         | podocalyxin-like                                                                    |
| (6,3) | Plekha5       | pleckstrin homology domain containing, family A member 5                            |
| (6,3) | Nr2c1         | nuclear receptor subfamily 2, group C, member 1                                     |
| (6,3) | Minpp1        | multiple inositol polyphosphate histidine phosphatase 1                             |

|       |         |                                                                          |
|-------|---------|--------------------------------------------------------------------------|
| (6,3) | Mcam    | melanoma cell adhesion molecule                                          |
| (6,3) | Laptm4b | lysosomal-associated protein transmembrane 4B                            |
| (6,3) | Lass2   | longevity assurance homolog 2 ( <i>S. cerevisiae</i> )                   |
| (6,3) | Hdac2   | histone deacetylase 2                                                    |
| (6,3) | Grsf1   | G-rich RNA sequence binding factor 1                                     |
| (6,3) | Gpc4    | glypican 4                                                               |
| (6,3) | Gtf2e2  | general transcription factor II E, polypeptide 2 (beta subunit)          |
| (6,3) | Frat2   | frequently rearranged in advanced T-cell lymphomas 2                     |
| (6,3) | Fbxo21  | F-box only protein 21                                                    |
| (6,3) | Erp29   | endoplasmic reticulum protein 29                                         |
| (6,3) | E2f5    | E2F transcription factor 5                                               |
| (6,3) | Ddx6    | DEAD (Asp-Glu-Ala-Asp) box polypeptide 6                                 |
| (6,3) | Ccnc    | cyclin C                                                                 |
| (6,3) | Ccdc99  | coiled-coil domain containing 99                                         |
| (6,3) | Coch    | coagulation factor C homolog ( <i>Limulus polyphemus</i> )               |
| (6,3) | Cbx5    | chromobox homolog 5 ( <i>Drosophila</i> HP1a)                            |
| (6,3) | Cbx3    | chromobox homolog 3 ( <i>Drosophila</i> HP1 gamma)                       |
| (6,3) | Clk2    | CDC-like kinase 2                                                        |
| (6,3) | Ctsc    | cathepsin C                                                              |
| (6,3) | Ctnna1  | catenin (cadherin associated protein), alpha 1                           |
| (6,3) | Calca   | calcitonin/calcitonin-related polypeptide, alpha                         |
| (6,3) | Bub3    | budding uninhibited by benzimidazoles 3 homolog ( <i>S. cerevisiae</i> ) |
| (6,3) | St6gal1 | beta galactoside alpha 2,6 sialyltransferase 1                           |
| (6,3) | Ankrd46 | ankyrin repeat domain 46                                                 |
| (6,3) | Aldh7a1 | aldehyde dehydrogenase family 7, member A1                               |
| (6,3) | Acvr2b  | activin receptor IIB                                                     |
| (6,3) | Anp32a  | acidic (leucine-rich) nuclear phosphoprotein 32 family, member A         |

---



## B

| Cluster | Symbol        | Gene description                                                                  |
|---------|---------------|-----------------------------------------------------------------------------------|
| (2,1)   | Zfpn1a1       | zinc finger protein, subfamily 1A, 1 (Ikaros)                                     |
| (2,1)   | Zfp36l2       | zinc finger protein 36, C3H type-like 2                                           |
| (2,1)   | Zap70         | zeta-chain (TCR) associated protein kinase                                        |
| (2,1)   | Maff          | v-maf musculoaponeurotic fibrosarcoma oncogene family, protein F (avian)          |
| (2,1)   | Vdr           | vitamin D receptor                                                                |
| (2,1)   | Vax2          | ventral anterior homeobox containing gene 2                                       |
| (2,1)   | Upp1          | uridine phosphorylase 1                                                           |
| (2,1)   | Ulk1          | Unc-51 like kinase 1 (C. elegans)                                                 |
| (2,1)   | Tnk2          | tyrosine kinase, non-receptor, 2                                                  |
| (2,1)   | Txk           | TXK tyrosine kinase                                                               |
| (2,1)   | Tnfsf8        | tumor necrosis factor (ligand) superfamily, member 8                              |
| (2,1)   | Tnfsf4        | tumor necrosis factor (ligand) superfamily, member 4                              |
| (2,1)   | Tmc6          | transmembrane channel-like gene family 6                                          |
| (2,1)   | Tspo          | translocator protein                                                              |
| (2,1)   | Tgfb2         | transforming growth factor, beta receptor II                                      |
| (2,1)   | Tgfb1         | transforming growth factor, beta 1                                                |
| (2,1)   | Mdm4          | transformed mouse 3T3 cell double minute 4                                        |
| (2,1)   | Thrb          | thyroid hormone receptor beta                                                     |
| (2,1)   | Txnip         | thioredoxin interacting protein                                                   |
| (2,1)   | Tcl1          | T-cell lymphoma breakpoint 1                                                      |
| (2,1)   | Tbx2          | T-box 2                                                                           |
| (2,1)   | Tapbp         | TAP binding protein                                                               |
| (2,1)   | Sfn           | stratifin                                                                         |
| (2,1)   | Sox15         | SRY-box containing gene 15                                                        |
| (2,1)   | Syk           | spleen tyrosine kinase                                                            |
| (2,1)   | Slc4a1        | solute carrier family 4 (anion exchanger), member 1                               |
| (2,1)   | Slc25a28      | solute carrier family 25, member 28                                               |
| (2,1)   | Slc1a6        | solute carrier family 1 (high affinity aspartate/glutamate transporter), member 6 |
| (2,1)   | Stat6         | signal transducer and activator of transcription 6                                |
| (2,1)   | Stat5b        | signal transducer and activator of transcription 5B                               |
| (2,1)   | Stat5a        | signal transducer and activator of transcription 5A                               |
| (2,1)   | Stat4         | signal transducer and activator of transcription 4                                |
| (2,1)   | Sfpi1         | SFFV proviral integration 1                                                       |
| (2,1)   | Rbm38         | RNA binding motif protein 38                                                      |
| (2,1)   | 4632413K17Rik | RIKEN cDNA 4632413K17 gene                                                        |
| (2,1)   | 2310004I24Rik | RIKEN cDNA 2310004I24 gene                                                        |
| (2,1)   | 2300002G24Rik | RIKEN cDNA 2300002G24 gene                                                        |
| (2,1)   | 1190002H23Rik | RIKEN cDNA 1190002H23 gene                                                        |
| (2,1)   | 1110008P14Rik | RIKEN cDNA 1110008P14 gene                                                        |
| (2,1)   | 1100001H23Rik | RIKEN cDNA 1100001H23 gene                                                        |
| (2,1)   | Rps6ka1       | ribosomal protein S6 kinase polypeptide 1                                         |

|       |          |                                                                                          |
|-------|----------|------------------------------------------------------------------------------------------|
| (2,1) | Rarg     | retinoic acid receptor, gamma                                                            |
| (2,1) | Rfx2     | regulatory factor X, 2 (influences HLA class II expression)                              |
| (2,1) | Rasa4    | RAS p21 protein activator 4                                                              |
| (2,1) | Rhod     | ras homolog gene family, member D                                                        |
| (2,1) | Rap2b    | RAP2B, member of RAS oncogene family                                                     |
| (2,1) | Pim1     | proviral integration site 1                                                              |
| (2,1) | Psmb9    | proteasome (prosome, macropain) subunit, beta type 9 (large multifunctional peptidase 2) |
| (2,1) | Psmb8    | proteasome (prosome, macropain) subunit, beta type 8 (large multifunctional peptidase 7) |
| (2,1) | Psmb10   | proteasome (prosome, macropain) subunit, beta type 10                                    |
| (2,1) | Ptgdr    | prostaglandin D receptor                                                                 |
| (2,1) | Pml      | promyelocytic leukemia                                                                   |
| (2,1) | Pstpip2  | proline-serine-threonine phosphatase-interacting protein 2                               |
| (2,1) | Pstpip1  | proline-serine-threonine phosphatase-interacting protein 1                               |
| (2,1) | Kcna3    | potassium voltage-gated channel, shaker-related subfamily, member 3                      |
| (2,1) | Pscd1    | pleckstrin homology, Sec7 and coiled-coil domains 1                                      |
| (2,1) | Plaur    | plasminogen activator, urokinase receptor                                                |
| (2,1) | Plcg2    | phospholipase C, gamma 2                                                                 |
| (2,1) | Olfm1    | olfactomedin 1                                                                           |
| (2,1) | Nr1d1    | nuclear receptor subfamily 1, group D, member 1                                          |
| (2,1) | Ncoal    | nuclear receptor coactivator 1                                                           |
| (2,1) | Nfil3    | nuclear factor, interleukin 3, regulated                                                 |
| (2,1) | Nfkb2    | nuclear factor of kappa light polypeptide gene enhancer in B-cells 2, p49/p100           |
| (2,1) | Nfkbib   | nuclear factor of kappa light chain gene enhancer in B-cells inhibitor, beta             |
| (2,1) | Neurod6  | neurogenic differentiation 6                                                             |
| (2,1) | Nedd4l   | neural precursor cell expressed, developmentally down-regulated gene 4-like              |
| (2,1) | Mef2b    | myocyte enhancer factor 2B                                                               |
| (2,1) | Myb      | myeloblastosis oncogene                                                                  |
| (2,1) | Muc1     | mucin 1, transmembrane                                                                   |
| (2,1) | Mgll     | monoglyceride lipase                                                                     |
| (2,1) | Mapk8ip3 | mitogen-activated protein kinase 8 interacting protein 3                                 |
| (2,1) | Mapk3    | mitogen activated protein kinase 3                                                       |
| (2,1) | Mapk13   | mitogen activated protein kinase 13                                                      |
| (2,1) | Matk     | megakaryocyte-associated tyrosine kinase                                                 |
| (2,1) | Mxd3     | Max dimerization protein 3                                                               |
| (2,1) | Mfng     | manic fringe homolog (Drosophila)                                                        |
| (2,1) | Mvp      | major vault protein                                                                      |
| (2,1) | Lyst     | lysosomal trafficking regulator                                                          |
| (2,1) | Ltbr     | lymphotoxin B receptor                                                                   |
| (2,1) | Ltb      | lymphotoxin B                                                                            |
| (2,1) | Lef1     | lymphoid enhancer binding factor 1                                                       |
| (2,1) | Lag3     | lymphocyte-activation gene 3                                                             |
| (2,1) | Lck      | lymphocyte protein tyrosine kinase                                                       |
| (2,1) | Limd2    | LIM domain containing 2                                                                  |
| (2,1) | Lgals9   | lectin, galactose binding, soluble 9                                                     |
| (2,1) | Lgals3   | lectin, galactose binding, soluble 3                                                     |

|       |           |                                                                                    |
|-------|-----------|------------------------------------------------------------------------------------|
| (2,1) | Klf5      | Kruppel-like factor 5                                                              |
| (2,1) | Klf13     | Kruppel-like factor 13                                                             |
| (2,1) | Klk8      | kallikrein 8                                                                       |
| (2,1) | Junb      | Jun-B oncogene                                                                     |
| (2,1) | Jund1     | Jun proto-oncogene related gene d1                                                 |
| (2,1) | Iqgap1    | IQ motif containing GTPase activating protein 1                                    |
| (2,1) | Il6ra     | interleukin 6 receptor, alpha                                                      |
| (2,1) | Il4ra     | interleukin 4 receptor, alpha                                                      |
| (2,1) | Il2rg     | interleukin 2 receptor, gamma chain                                                |
| (2,1) | Irf1      | interferon regulatory factor 1                                                     |
| (2,1) | Itgb7     | integrin beta 7                                                                    |
| (2,1) | Itgam     | integrin alpha M                                                                   |
| (2,1) | Itga4     | integrin alpha 4                                                                   |
| (2,1) | Hcn2      | hyperpolarization-activated, cyclic nucleotide-gated K+ 2                          |
| (2,1) | Hic1      | hypermethylated in cancer 1                                                        |
| (2,1) | Hoxa4     | homeo box A4                                                                       |
| (2,1) | Hist2h3c1 | histone 2, H3c1                                                                    |
| (2,1) | Hist1h2bp | Histone 1, H2bp                                                                    |
| (2,1) | Hist1h1e  | histone 1, H1e                                                                     |
| (2,1) | Hmha1     | histocompatibility (minor) HA-1                                                    |
| (2,1) | Hes2      | hairy and enhancer of split 2 (Drosophila)                                         |
| (2,1) | Hr        | hairless                                                                           |
| (2,1) | H2afj     | H2A histone family, member J                                                       |
| (2,1) | Hlx1      | H2.0-like homeo box 1 (Drosophila)                                                 |
| (2,1) | Gch1      | GTP cyclohydrolase 1                                                               |
| (2,1) | Gab2      | growth factor receptor bound protein 2-associated protein 2                        |
| (2,1) | Gadd45b   | growth arrest and DNA-damage-inducible 45 beta                                     |
| (2,1) | Grap2     | GRB2-related adaptor protein 2                                                     |
| (2,1) | Gstk1     | glutathione S-transferase kappa 1                                                  |
| (2,1) | Gjb5      | gap junction membrane channel protein beta 5                                       |
| (2,1) | Gjb3      | gap junction membrane channel protein beta 3                                       |
| (2,1) | Gpr137b   | G protein-coupled receptor 137B                                                    |
| (2,1) | Folr1     | folate receptor 1 (adult)                                                          |
| (2,1) | Flt3      | FMS-like tyrosine kinase 3                                                         |
| (2,1) | Fgfbp1    | fibroblast growth factor binding protein 1                                         |
| (2,1) | Ehf       | ets homologous factor                                                              |
| (2,1) | Emcn      | endomucin                                                                          |
| (2,1) | Elf3      | E74-like factor 3                                                                  |
| (2,1) | Dync1i1   | dynein cytoplasmic 1 intermediate chain 1                                          |
| (2,1) | Drap1     | Dr1 associated protein 1 (negative cofactor 2 alpha)                               |
| (2,1) | Dmc1h     | disrupted meiotic cDNA 1 homolog                                                   |
| (2,1) | Crlf3     | cytokine receptor-like factor 3                                                    |
| (2,1) | Cyba      | cytochrome b-245, alpha polypeptide                                                |
| (2,1) | Crip1     | cysteine-rich protein 1 (intestinal)                                               |
| (2,1) | Csf2ra    | colony stimulating factor 2 receptor, alpha, low-affinity (granulocyte-macrophage) |

|       |               |                                                                                       |
|-------|---------------|---------------------------------------------------------------------------------------|
| (2,1) | Chchd2        | coiled-coil-helix-coiled-coil-helix domain containing 2                               |
| (2,1) | Cldn4         | claudin 4                                                                             |
| (2,1) | Centb1        | centaurin, beta 1                                                                     |
| (2,1) | Clk3          | CDC-like kinase 3                                                                     |
| (2,1) | Cdc42se1      | CDC42 small effector 1                                                                |
| (2,1) | Cd83          | CD83 antigen                                                                          |
| (2,1) | Cd8b1         | CD8 antigen, beta chain 1                                                             |
| (2,1) | Cd79b         | CD79B antigen                                                                         |
| (2,1) | Cd40          | CD40 antigen                                                                          |
| (2,1) | Cd28          | CD28 antigen                                                                          |
| (2,1) | Comt          | catechol-O-methyltransferase                                                          |
| (2,1) | Car12         | carbonic anhydrase 12                                                                 |
| (2,1) | Car2          | carbonic anhydrase 2                                                                  |
| (2,1) | Capg          | capping protein (actin filament), gelsolin-like                                       |
| (2,1) | Blnk          | B-cell linker                                                                         |
| (2,1) | Aire          | autoimmune regulator (autoimmune polyendocrinopathy candidiasis ectodermal dystrophy) |
| (2,1) | Atn1          | atrophin 1                                                                            |
| (2,1) | Abcb4         | ATP-binding cassette, sub-family B (MDR/TAP), member 4                                |
| (2,1) | Abca2         | ATP-binding cassette, sub-family A (ABC1), member 2                                   |
| (2,1) | Atp2a3        | ATPase, Ca <sup>++</sup> transporting, ubiquitous                                     |
| (2,1) | Avpi1         | arginine vasopressin-induced 1                                                        |
| (2,1) | Avp           | arginine vasopressin                                                                  |
| (2,1) | Aes           | amino-terminal enhancer of split                                                      |
| (2,1) | Alad          | aminolevulinate, delta-, dehydratase                                                  |
| (2,1) | Ap1b1         | adaptor protein complex AP-1, beta 1 subunit                                          |
| (2,1) | Ache          | acetylcholinesterase                                                                  |
| (2,1) | Abhd8         | abhydrolase domain containing 8                                                       |
| (2,1) | Agpat3        | 1-acylglycerol-3-phosphate O-acyltransferase 3                                        |
| (2,4) | Zyx           | zyxin                                                                                 |
| (2,4) | Zbtb7b        | Zinc finger and BTB domain containing 7B                                              |
| (2,4) | Vipr2         | vasoactive intestinal peptide receptor 2                                              |
| (2,4) | Tead3         | TEA domain family member 3                                                            |
| (2,4) | Taf10         | TAF10 RNA polymerase II, TATA box binding protein (TBP)-associated factor             |
| (2,4) | Synj2         | synaptojanin 2                                                                        |
| (2,4) | Supt6h        | suppressor of Ty 6 homolog (S. cerevisiae)                                            |
| (2,4) | Sdf4          | stromal cell derived factor 4                                                         |
| (2,4) | Slc22a5       | solute carrier family 22 (organic cation transporter), member 5                       |
| (2,4) | Serpine1      | serine (or cysteine) peptidase inhibitor, clade E, member 1                           |
| (2,4) | Ryr1          | ryanodine receptor 1, skeletal muscle                                                 |
| (2,4) | Src           | Rous sarcoma oncogene                                                                 |
| (2,4) | 1500034J01Rik | RIKEN cDNA 1500034J01 gene                                                            |
| (2,4) | 1110033J19Rik | RIKEN cDNA 1110033J19 gene                                                            |
| (2,4) | Rbbp4         | retinoblastoma binding protein 4                                                      |
| (2,4) | Rac3          | RAS-related C3 botulinum substrate 3                                                  |
| (2,4) | Rad51l1       | RAD51-like 1 (S. cerevisiae)                                                          |

|       |           |                                                                                    |
|-------|-----------|------------------------------------------------------------------------------------|
| (2,4) | Ptprn     | protein tyrosine phosphatase, receptor type, N                                     |
| (2,4) | Ppp1r3c   | protein phosphatase 1, regulatory (inhibitor) subunit 3C                           |
| (2,4) | Prkar2a   | protein kinase, cAMP dependent regulatory, type II alpha                           |
| (2,4) | Col8a1    | procollagen, type VIII, alpha 1                                                    |
| (2,4) | Kcnma1    | potassium large conductance calcium-activated channel, subfamily M, alpha member 1 |
| (2,4) | Pld3      | phospholipase D family, member 3                                                   |
| (2,4) | Pip5k1c   | phosphatidylinositol-4-phosphate 5-kinase, type 1 gamma                            |
| (2,4) | Pxn       | paxillin                                                                           |
| (2,4) | Prcc      | papillary renal cell carcinoma (translocation-associated)                          |
| (2,4) | Npdc1     | neural proliferation, differentiation and control gene 1                           |
| (2,4) | Ndst1     | N-deacetylase/N-sulfotransferase (heparan glucosaminyl) 1                          |
| (2,4) | Map3k6    | mitogen-activated protein kinase kinase kinase 6                                   |
| (2,4) | Mt2       | metallothionein 2                                                                  |
| (2,4) | Mmp9      | matrix metalloproteinase 9                                                         |
| (2,4) | Matn3     | matrilin 3                                                                         |
| (2,4) | Mrc2      | mannose receptor, C type 2                                                         |
| (2,4) | Lrp5      | low density lipoprotein receptor-related protein 5                                 |
| (2,4) | Lima1     | LIM domain and actin binding 1                                                     |
| (2,4) | Lmna      | lamin A                                                                            |
| (2,4) | Itgb4     | integrin beta 4                                                                    |
| (2,4) | Inpp1     | inositol polyphosphate-1-phosphatase                                               |
| (2,4) | Hcfc1r1   | host cell factor C1 regulator 1 (XPO1-dependent)                                   |
| (2,4) | Bat2      | HLA-B associated transcript 2                                                      |
| (2,4) | Hist1h2bb | histone 1, H2bb                                                                    |
| (2,4) | Rras      | Harvey rat sarcoma oncogene, subgroup R                                            |
| (2,4) | Gramd3    | GRAM domain containing 3                                                           |
| (2,4) | Cga       | glycoprotein hormones, alpha subunit                                               |
| (2,4) | Glrx      | glutaredoxin                                                                       |
| (2,4) | G6pd2     | glucose-6-phosphate dehydrogenase 2                                                |
| (2,4) | Fzd9      | frizzled homolog 9 (Drosophila)                                                    |
| (2,4) | Freq      | frequenin homolog (Drosophila)                                                     |
| (2,4) | Fgf9      | fibroblast growth factor 9                                                         |
| (2,4) | Fgf1      | fibroblast growth factor 1                                                         |
| (2,4) | Epor      | erythropoietin receptor                                                            |
| (2,4) | Egfr      | epidermal growth factor receptor                                                   |
| (2,4) | Efna5     | ephrin A5                                                                          |
| (2,4) | Eng       | endoglin                                                                           |
| (2,4) | D4Wsu114e | DNA segment, Chr 4, Wayne State University 114, expressed                          |
| (2,4) | Dlx4      | distal-less homeobox 4                                                             |
| (2,4) | Dtx2      | deltex 2 homolog (Drosophila)                                                      |
| (2,4) | Dcc       | deleted in colorectal carcinoma                                                    |
| (2,4) | Ddhd2     | DDHD domain containing 2                                                           |
| (2,4) | Carm1     | coactivator-associated arginine methyltransferase 1                                |
| (2,4) | Cnn1      | calponin 1                                                                         |
| (2,4) | Capns1    | calpain, small subunit 1                                                           |

|       |               |                                                                                               |
|-------|---------------|-----------------------------------------------------------------------------------------------|
| (2,4) | Celsr1        | cadherin EGF LAG seven-pass G-type receptor 1                                                 |
| (2,4) | Bdkrb2        | bradykinin receptor, beta 2                                                                   |
| (2,4) | Bhmt2         | betaine-homocysteine methyltransferase 2                                                      |
| (2,4) | Bik           | Bcl2-interacting killer                                                                       |
| (2,4) | Atg7          | autophagy-related 7 (yeast)                                                                   |
| (2,4) | Alox15        | arachidonate 15-lipoxygenase                                                                  |
| (2,4) | Htr1f         | 5-hydroxytryptamine (serotonin) receptor 1F                                                   |
| (2,5) | Araf          | v-raf murine sarcoma 3611 viral oncogene homolog                                              |
| (2,5) | ErbB3         | v-erb-b2 erythroblastic leukemia viral oncogene homolog 3 (avian)                             |
| (2,5) | Unc84a        | unc-84 homolog A (C. elegans)                                                                 |
| (2,5) | Tnfrsf21      | tumor necrosis factor receptor superfamily, member 21                                         |
| (2,5) | Tulp3         | tubby-like protein 3                                                                          |
| (2,5) | Trim28        | tripartite motif protein 28                                                                   |
| (2,5) | Trp53         | transformation related protein 53                                                             |
| (2,5) | Sin3b         | transcriptional regulator, SIN3B (yeast)                                                      |
| (2,5) | Tcf2          | transcription factor 2                                                                        |
| (2,5) | Sox13         | SRY-box containing gene 13                                                                    |
| (2,5) | Spnb3         | spectrin beta 3                                                                               |
| (2,5) | Sec22b        | SEC22 vesicle trafficking protein homolog B (S. cerevisiae)                                   |
| (2,5) | Sec14l1       | SEC14-like 1 (S. cerevisiae)                                                                  |
| (2,5) | A430005L14Rik | RIKEN cDNA A430005L14 gene                                                                    |
| (2,5) | 4932441K18Rik | RIKEN cDNA 4932441K18 gene                                                                    |
| (2,5) | 2810002I04Rik | RIKEN cDNA 2810002I04 gene                                                                    |
| (2,5) | Pink1         | PTEN induced putative kinase 1                                                                |
| (2,5) | Ptpn1         | protein tyrosine phosphatase, non-receptor type 1                                             |
| (2,5) | Pou3f1        | POU domain, class 3, transcription factor 1                                                   |
| (2,5) | Plcb3         | phospholipase C, beta 3                                                                       |
| (2,5) | Nfatc2ip      | nuclear factor of activated T-cells, cytoplasmic, calcineurin-dependent 2 interacting protein |
| (2,5) | Npas1         | neuronal PAS domain protein 1                                                                 |
| (2,5) | Mybbp1a       | MYB binding protein (P160) 1a                                                                 |
| (2,5) | Map2k7        | mitogen activated protein kinase kinase 7                                                     |
| (2,5) | Mccc1         | methylcrotonoyl-Coenzyme A carboxylase 1 (alpha)                                              |
| (2,5) | Smad7         | MAD homolog 7 (Drosophila)                                                                    |
| (2,5) | Ltbp2         | latent transforming growth factor beta binding protein 2                                      |
| (2,5) | Igfbp6        | insulin-like growth factor binding protein 6                                                  |
| (2,5) | Hebp1         | heme binding protein 1                                                                        |
| (2,5) | Hspa11        | heat shock protein 1-like                                                                     |
| (2,5) | Gnaq          | guanine nucleotide binding protein, alpha q polypeptide                                       |
| (2,5) | Grb2          | growth factor receptor bound protein 2                                                        |
| (2,5) | Gstm2         | glutathione S-transferase, mu 2                                                               |
| (2,5) | Flot1         | flotillin 1                                                                                   |
| (2,5) | Flnb          | filamin, beta                                                                                 |
| (2,5) | Fgf5          | fibroblast growth factor 5                                                                    |
| (2,5) | Ch25h         | cholesterol 25-hydroxylase                                                                    |
| (2,5) | Ches1         | checkpoint suppressor 1                                                                       |

|       |           |                                                                                         |
|-------|-----------|-----------------------------------------------------------------------------------------|
| (2,5) | Casp7     | caspase 7                                                                               |
| (2,5) | Creb1     | cAMP responsive element binding protein 1                                               |
| (2,5) | Bmx       | BMX non-receptor tyrosine kinase                                                        |
| (2,5) | Rnpep     | arginyl aminopeptidase (aminopeptidase B)                                               |
| (2,5) | Ass1      | argininosuccinate synthetase 1                                                          |
| (2,5) | Ankrd47   | ankyrin repeat domain 47                                                                |
| (2,5) | Asb6      | ankyrin repeat and SOCS box-containing protein 6                                        |
| (2,5) | Aoc3      | amine oxidase, copper containing 3                                                      |
| (2,5) | Naglu     | alpha-N-acetylglucosaminidase (Sanfilippo disease IIIB)                                 |
| (2,6) | Zswim1    | zinc finger, SWIM domain containing 1                                                   |
| (2,6) | Zfp444    | zinc finger protein 444                                                                 |
| (2,6) | Tnnt3     | troponin T3, skeletal, fast                                                             |
| (2,6) | Trim21    | tripartite motif protein 21                                                             |
| (2,6) | Tmem11    | transmembrane protein 11                                                                |
| (2,6) | Trh       | thyrotropin releasing hormone                                                           |
| (2,6) | Snta1     | syntrophin, acidic 1                                                                    |
| (2,6) | Socs3     | suppressor of cytokine signaling 3                                                      |
| (2,6) | Shh       | sonic hedgehog                                                                          |
| (2,6) | Sstr4     | somatostatin receptor 4                                                                 |
| (2,6) | Slc26a1   | solute carrier family 26 (sulfate transporter), member 1                                |
| (2,6) | Slc25a20  | solute carrier family 25 (mitochondrial carnitine/acylcarnitine translocase), member 20 |
| (2,6) | Slc22a18  | solute carrier family 22 (organic cation transporter), member 18                        |
| (2,6) | Smu1      | smu-1 suppressor of mec-8 and unc-52 homolog (C. elegans)                               |
| (2,6) | Sirt3     | sirtuin 3 (silent mating type information regulation 2, homolog) 3 (S. cerevisiae)      |
| (2,6) | Six6      | sine oculis-related homeobox 6 homolog (Drosophila)                                     |
| (2,6) | Serpina3n | serine (or cysteine) peptidase inhibitor, clade A, member 3N                            |
| (2,6) | Sema6d    | sema domain, transmembrane domain (TM), and cytoplasmic domain, (semaphorin) 6D         |
| (2,6) | Sema4f    | sema domain, immunoglobulin domain (Ig), TM domain, and short cytoplasmic domain        |
| (2,6) | Rom1      | rod outer segment membrane protein 1                                                    |
| (2,6) | Rbms2     | RNA binding motif, single stranded interacting protein 2                                |
| (2,6) | Arhgdig   | Rho GDP dissociation inhibitor (GDI) gamma                                              |
| (2,6) | Rxrg      | retinoid X receptor gamma                                                               |
| (2,6) | Rax       | retina and anterior neural fold homeobox                                                |
| (2,6) | Rtn2      | reticulon 2 (Z-band associated protein)                                                 |
| (2,6) | Rage      | renal tumor antigen                                                                     |
| (2,6) | Ramp3     | receptor (calcitonin) activity modifying protein 3                                      |
| (2,6) | Rab11b    | RAB11B, member RAS oncogene family                                                      |
| (2,6) | Pdk4      | pyruvate dehydrogenase kinase, isoenzyme 4                                              |
| (2,6) | Ptp4a3    | protein tyrosine phosphatase 4a3                                                        |
| (2,6) | Ppp3cc    | protein phosphatase 3, catalytic subunit, gamma isoform                                 |
| (2,6) | Prkce     | protein kinase C, epsilon                                                               |
| (2,6) | Pcsk2     | proprotein convertase subtilisin/kexin type 2                                           |
| (2,6) | Col2a1    | procollagen, type II, alpha 1                                                           |
| (2,6) | Pou2f3    | POU domain, class 2, transcription factor 3                                             |
| (2,6) | Pou2f2    | POU domain, class 2, transcription factor 2                                             |

|       |         |                                                                        |
|-------|---------|------------------------------------------------------------------------|
| (2,6) | Kcnj3   | potassium inwardly-rectifying channel, subfamily J, member 3           |
| (2,6) | Plcd1   | phospholipase C, delta 1                                               |
| (2,6) | Pla2g6  | phospholipase A2, group VI                                             |
| (2,6) | Pde6g   | phosphodiesterase 6G, cGMP-specific, rod, gamma                        |
| (2,6) | Pde1c   | phosphodiesterase 1C                                                   |
| (2,6) | Pde1b   | phosphodiesterase 1B, Ca <sup>2+</sup> -calmodulin dependent           |
| (2,6) | Pi4k2a  | phosphatidylinositol 4-kinase type 2 alpha                             |
| (2,6) | Padi1   | peptidyl arginine deiminase, type I                                    |
| (2,6) | Pdlim4  | PDZ and LIM domain 4                                                   |
| (2,6) | Pvalb   | parvalbumin                                                            |
| (2,6) | Ppy     | Pancreatic polypeptide                                                 |
| (2,6) | Prop1   | paired like homeodomain factor 1                                       |
| (2,6) | Pax4    | paired box gene 4                                                      |
| (2,6) | Nr2c2   | nuclear receptor subfamily 2, group C, member 2                        |
| (2,6) | Nr1i3   | nuclear receptor subfamily 1, group I, member 3                        |
| (2,6) | Nr1i2   | nuclear receptor subfamily 1, group I, member 2                        |
| (2,6) | Notch4  | Notch gene homolog 4 (Drosophila)                                      |
| (2,6) | Nkx2-9  | NK2 transcription factor related, locus 9 (Drosophila)                 |
| (2,6) | Myo7a   | myosin VIIa                                                            |
| (2,6) | Mta2    | metastasis-associated gene family, member 2                            |
| (2,6) | Mt3     | metallothionein 3                                                      |
| (2,6) | Matn1   | matrilin 1, cartilage matrix protein 1                                 |
| (2,6) | Mknk1   | MAP kinase-interacting serine/threonine kinase 1                       |
| (2,6) | Ltk     | leukocyte tyrosine kinase                                              |
| (2,6) | Ksr1    | kinase suppressor of ras 1                                             |
| (2,6) | Kcns1   | K <sup>+</sup> voltage-gated channel, subfamily S, 1                   |
| (2,6) | Jak3    | Janus kinase 3                                                         |
| (2,6) | Jag2    | jagged 2                                                               |
| (2,6) | Il12rb2 | interleukin 12 receptor, beta 2                                        |
| (2,6) | Irf4    | interferon regulatory factor 4                                         |
| (2,6) | Itih4   | inter alpha-trypsin inhibitor, heavy chain 4                           |
| (2,6) | Has1    | hyaluronan synthase 1                                                  |
| (2,6) | Hoxb6   | homeo box B6                                                           |
| (2,6) | Hoxa2   | homeo box A2                                                           |
| (2,6) | Hdac5   | histone deacetylase 5                                                  |
| (2,6) | H2-Ab1  | histocompatibility 2, class II antigen A, beta 1                       |
| (2,6) | Hmox2   | heme oxygenase (decycling) 2                                           |
| (2,6) | Gng3    | guanine nucleotide binding protein (G protein), gamma 3 subunit        |
| (2,6) | Gdf5    | growth differentiation factor 5                                        |
| (2,6) | Gp5     | glycoprotein 5 (platelet)                                              |
| (2,6) | Gcat    | glycine C-acetyltransferase (2-amino-3-ketobutyrate-coenzyme A ligase) |
| (2,6) | Gstm5   | glutathione S-transferase, mu 5                                        |
| (2,6) | Grin1   | glutamate receptor, ionotropic, NMDA1 (zeta 1)                         |
| (2,6) | Gabra2  | gamma-aminobutyric acid (GABA-A) receptor, subunit alpha 2             |
| (2,6) | Galr3   | galanin receptor 3                                                     |

|       |           |                                                                                 |
|-------|-----------|---------------------------------------------------------------------------------|
| (2,6) | Foxn1     | forkhead box N1                                                                 |
| (2,6) | Foxj1     | forkhead box J1                                                                 |
| (2,6) | Fpgs      | folylpolyglutamyl synthetase                                                    |
| (2,6) | Fgf18     | fibroblast growth factor 18                                                     |
| (2,6) | Fgf12     | fibroblast growth factor 12                                                     |
| (2,6) | Fntb      | farnesyltransferase, CAAX box, beta                                             |
| (2,6) | Erf       | Ets2 repressor factor                                                           |
| (2,6) | Esrra     | estrogen related receptor, alpha                                                |
| (2,6) | Esr1      | estrogen receptor 1 (alpha)                                                     |
| (2,6) | Ephx2     | epoxide hydrolase 2, cytoplasmic                                                |
| (2,6) | Ephx1     | epoxide hydrolase 1, microsomal                                                 |
| (2,6) | Eno3      | enolase 3, beta muscle                                                          |
| (2,6) | Ezh1      | enhancer of zeste homolog 1 (Drosophila)                                        |
| (2,6) | Edn3      | endothelin 3                                                                    |
| (2,6) | Ets1      | E26 avian leukemia oncogene 1, 5' domain                                        |
| (2,6) | Ddit4     | DNA-damage-inducible transcript 4                                               |
| (2,6) | Cyp27b1   | cytochrome P450, family 27, subfamily b, polypeptide 1                          |
| (2,6) | Cdk5r2    | cyclin-dependent kinase 5, regulatory subunit 2 (p39)                           |
| (2,6) | Cdk5r1    | cyclin-dependent kinase 5, regulatory subunit (p35) 1                           |
| (2,6) | Cuedc2    | CUE domain containing 2                                                         |
| (2,6) | Crhr1     | corticotropin releasing hormone receptor 1                                      |
| (2,6) | Ccs       | copper chaperone for superoxide dismutase                                       |
| (2,6) | Clpb      | ClpB caseinolytic peptidase B homolog (E. coli)                                 |
| (2,6) | Ctrl      | chymotrypsin-like                                                               |
| (2,6) | Chrd      | chordin                                                                         |
| (2,6) | Ccl27     | chemokine (C-C motif) ligand 27                                                 |
| (2,6) | Cited1    | Cbp/p300-interacting transactivator with Glu/Asp-rich carboxy-terminal domain 1 |
| (2,6) | Crebl1    | cAMP responsive element binding protein-like 1                                  |
| (2,6) | Capn5     | calpain 5                                                                       |
| (2,6) | Baiap2    | brain-specific angiogenesis inhibitor 1-associated protein 2                    |
| (2,6) | Bhmt      | betaine-homocysteine methyltransferase                                          |
| (2,6) | Aip       | aryl-hydrocarbon receptor-interacting protein                                   |
| (2,6) | Arnt      | aryl hydrocarbon receptor nuclear translocator                                  |
| (2,6) | Accn1     | amiloride-sensitive cation channel 1, neuronal (degenerin)                      |
| (2,6) | Apc2      | adenomatosis polyposis coli 2                                                   |
| (2,6) | Acp6      | acid phosphatase 6, lysophosphatidic                                            |
| (2,6) | Adam23    | a disintegrin and metallopeptidase domain 23                                    |
| (2,6) | Adam12    | a disintegrin and metallopeptidase domain 12 (meltrin alpha)                    |
| (3,1) | Tmem40    | transmembrane protein 40                                                        |
| (3,1) | Tm4sf1    | transmembrane 4 superfamily member 1                                            |
| (3,1) | Mdm2      | transformed mouse 3T3 cell double minute 2                                      |
| (3,1) | Scap2     | src family associated phosphoprotein 2                                          |
| (3,1) | Slc7a7    | solute carrier family 7 (cationic amino acid transporter, y+ system), member 7  |
| (3,1) | Six5      | sine oculis-related homeobox 5 homolog (Drosophila)                             |
| (3,1) | LOC238836 | similar to H3 histone, family 3B                                                |

|       |               |                                                                     |
|-------|---------------|---------------------------------------------------------------------|
| (3,1) | Sgk           | serum/glucocorticoid regulated kinase                               |
| (3,1) | Stk10         | serine/threonine kinase 10                                          |
| (3,1) | Serpinb6a     | serine (or cysteine) peptidase inhibitor, clade B, member 6a        |
| (3,1) | Sqstm1        | sequestosome 1                                                      |
| (3,1) | 4930504E06Rik | RIKEN cDNA 4930504E06 gene                                          |
| (3,1) | 2700055K07Rik | RIKEN cDNA 2700055K07 gene                                          |
| (3,1) | Rxra          | retinoid X receptor alpha                                           |
| (3,1) | Ranbp10       | RAN binding protein 10                                              |
| (3,1) | Ptpcr         | protein tyrosine phosphatase, receptor type, C                      |
| (3,1) | Kcnb1         | potassium voltage gated channel, Shab-related subfamily, member 1   |
| (3,1) | Pcaf          | p300/CBP-associated factor                                          |
| (3,1) | Ostf1         | osteoclast stimulating factor 1                                     |
| (3,1) | Nfyc          | nuclear transcription factor-Y gamma                                |
| (3,1) | Nr4a2         | nuclear receptor subfamily 4, group A, member 2                     |
| (3,1) | Nr4a1         | nuclear receptor subfamily 4, group A, member 1                     |
| (3,1) | Nupr1         | nuclear protein 1                                                   |
| (3,1) | Myo5a         | myosin Va                                                           |
| (3,1) | Mpl           | myeloproliferative leukemia virus oncogene                          |
| (3,1) | Mzf1          | myeloid zinc finger 1                                               |
| (3,1) | Myc           | myelocytomatosis oncogene                                           |
| (3,1) | Max           | Max protein                                                         |
| (3,1) | Mxd1          | MAX dimerization protein 1                                          |
| (3,1) | Mkrm1         | makorin, ring finger protein, 1                                     |
| (3,1) | Klf4          | Kruppel-like factor 4 (gut)                                         |
| (3,1) | Klf2          | Kruppel-like factor 2 (lung)                                        |
| (3,1) | Klhl21        | kelch-like 21 (Drosophila)                                          |
| (3,1) | Icam1         | intercellular adhesion molecule                                     |
| (3,1) | Impdh1        | inosine 5'-phosphate dehydrogenase 1                                |
| (3,1) | Hoxa6         | homeo box A6                                                        |
| (3,1) | H2-Ea         | histocompatibility 2, class II antigen E alpha                      |
| (3,1) | Hck           | hemopoietic cell kinase                                             |
| (3,1) | Hspb8         | heat shock protein 8                                                |
| (3,1) | Gbp2          | guanylate nucleotide binding protein 2                              |
| (3,1) | Gabarapl2     | gamma-aminobutyric acid (GABA-A) receptor-associated protein-like 2 |
| (3,1) | Gprasp1       | G protein-coupled receptor associated sorting protein 1             |
| (3,1) | Foxp1         | forkhead box P1                                                     |
| (3,1) | Fcrla         | Fc receptor, IgE, high affinity I, alpha polypeptide                |
| (3,1) | Eif1a         | eukaryotic translation initiation factor 1A                         |
| (3,1) | Eif1          | eukaryotic translation initiation factor 1                          |
| (3,1) | Ereg          | epiregulin                                                          |
| (3,1) | Epha2         | Eph receptor A2                                                     |
| (3,1) | Ell2          | elongation factor RNA polymerase II 2                               |
| (3,1) | Dnase1l3      | deoxyribonuclease 1-like 3                                          |
| (3,1) | Dhrs8         | dehydrogenase/reductase (SDR family) member 8                       |
| (3,1) | Dcp1a         | decapping enzyme                                                    |

|       |           |                                                              |
|-------|-----------|--------------------------------------------------------------|
| (3,1) | Cyb5r1    | cytochrome b5 reductase 1                                    |
| (3,1) | Cxxc1     | CXXC finger 1 (PHD domain)                                   |
| (3,1) | Comm3     | COMM domain containing 3                                     |
| (3,1) | Cd244     | CD244 natural killer cell receptor 2B4                       |
| (3,1) | Cd1d1     | CD1d1 antigen                                                |
| (3,1) | Cebpd     | CCAAT/enhancer binding protein (C/EBP), delta                |
| (3,1) | Bst1      | bone marrow stromal cell antigen 1                           |
| (3,1) | Bid       | BH3 interacting domain death agonist                         |
| (3,1) | Relb      | avian reticuloendotheliosis viral (v-rel) oncogene related B |
| (3,1) | Abcb1a    | ATP-binding cassette, sub-family B (MDR/TAP), member 1A      |
| (3,1) | Arntl     | aryl hydrocarbon receptor nuclear translocator-like          |
| (3,1) | Acyp2     | acylphosphatase 2, muscle type                               |
| (3,1) | Anp32b    | acidic nuclear phosphoprotein 32 family, member B            |
| (3,4) | Zfp706    | zinc finger protein 706                                      |
| (3,4) | Vamp3     | vesicle-associated membrane protein 3                        |
| (3,4) | Tpd52l1   | tumor protein D52-like 1                                     |
| (3,4) | Tubb6     | tubulin, beta 6                                              |
| (3,4) | Tagln     | transgelin                                                   |
| (3,4) | Tcf20     | transcription factor 20                                      |
| (3,4) | Skil      | SKI-like                                                     |
| (3,4) | Sec61g    | SEC61, gamma subunit                                         |
| (3,4) | S100a11   | S100 calcium binding protein A11 (calizzarin)                |
| (3,4) | Rhoa      | ras homolog gene family, member A                            |
| (3,4) | Ppp5c     | protein phosphatase 5, catalytic subunit                     |
| (3,4) | Pkp3      | plakophilin 3                                                |
| (3,4) | Plcb1     | phospholipase C, beta 1                                      |
| (3,4) | Mpg       | N-methylpurine-DNA glycosylase                               |
| (3,4) | Nov       | nephroblastoma overexpressed gene                            |
| (3,4) | Mfap5     | microfibrillar associated protein 5                          |
| (3,4) | Met       | met proto-oncogene                                           |
| (3,4) | Lsr       | lipolysis stimulated lipoprotein receptor                    |
| (3,4) | Ltbp4     | latent transforming growth factor beta binding protein 4     |
| (3,4) | Lama3     | laminin, alpha 3                                             |
| (3,4) | Kpna4     | karyopherin (importin) alpha 4                               |
| (3,4) | Hhat      | Hedgehog acyltransferase                                     |
| (3,4) | Hsf2      | heat shock factor 2                                          |
| (3,4) | Grhl2     | Grainyhead-like 2 (Drosophila)                               |
| (3,4) | G6pdx     | glucose-6-phosphate dehydrogenase X-linked                   |
| (3,4) | Gbx2      | gastrulation brain homeobox 2                                |
| (3,4) | Fosl2     | fos-like antigen 2                                           |
| (3,4) | Fkbp1a    | FK506 binding protein 1a                                     |
| (3,4) | Epb4.114a | erythrocyte protein band 4.1-like 4a                         |
| (3,4) | Dus11     | dihydrouridine synthase 1-like (S. cerevisiae)               |
| (3,4) | Cpt1a     | carnitine palmitoyltransferase 1a, liver                     |
| (3,4) | Cbr3      | carbonyl reductase 3                                         |

|       |               |                                                                           |
|-------|---------------|---------------------------------------------------------------------------|
| (3,4) | Atxn1         | ataxin 1                                                                  |
| (3,4) | Avpr1a        | arginine vasopressin receptor 1A                                          |
| (3,4) | Actn4         | actinin alpha 4                                                           |
| (3,4) | Adam19        | a disintegrin and metallopeptidase domain 19 (meltrin beta)               |
| (3,5) | Zfp30         | zinc finger protein 30                                                    |
| (3,5) | Zfp110        | zinc finger protein 110                                                   |
| (3,5) | Zfp106        | zinc finger protein 106                                                   |
| (3,5) | Tmem131       | transmembrane protein 131                                                 |
| (3,5) | Tm7sf3        | transmembrane 7 superfamily member 3                                      |
| (3,5) | Tle4          | transducin-like enhancer of split 4, homolog of Drosophila E(spl)         |
| (3,5) | Tcfap2c       | transcription factor AP-2, gamma                                          |
| (3,5) | Txn1          | thioredoxin 1                                                             |
| (3,5) | Tspan5        | tetraspanin 5                                                             |
| (3,5) | Socs2         | suppressor of cytokine signaling 2                                        |
| (3,5) | Sfrs6         | splicing factor, arginine/serine-rich 6                                   |
| (3,5) | Scye1         | small inducible cytokine subfamily E, member 1                            |
| (3,5) | Setdb1        | SET domain, bifurcated 1                                                  |
| (3,5) | Rpo1-3        | RNA polymerase 1-3                                                        |
| (3,5) | 0910001A06Rik | RIKEN cDNA 0910001A06 gene                                                |
| (3,5) | Rexo2         | REX2, RNA exonuclease 2 homolog (S. cerevisiae)                           |
| (3,5) | Rbck1         | RanBP-type and C3HC4-type zinc finger containing 1                        |
| (3,5) | Rab8b         | RAB8B, member RAS oncogene family                                         |
| (3,5) | Ppa2          | pyrophosphatase (inorganic) 2                                             |
| (3,5) | Ptpn2         | protein tyrosine phosphatase, non-receptor type 2                         |
| (3,5) | Ppp2r5c       | protein phosphatase 2, regulatory subunit B (B56), gamma isoform          |
| (3,5) | Kcnk1         | potassium channel, subfamily K, member 1                                  |
| (3,5) | Prps2         | phosphoribosyl pyrophosphate synthetase 2                                 |
| (3,5) | Pik3c3        | phosphoinositide-3-kinase, class 3                                        |
| (3,5) | Olfir90       | olfactory receptor 90                                                     |
| (3,5) | Ncoa3         | nuclear receptor coactivator 3                                            |
| (3,5) | Nf2           | neurofibromatosis 2                                                       |
| (3,5) | Ngfb          | nerve growth factor, beta                                                 |
| (3,5) | Naca          | nascent polypeptide-associated complex alpha polypeptide                  |
| (3,5) | Map4k4        | mitogen-activated protein kinase kinase kinase kinase 4                   |
| (3,5) | Mcm3ap        | minichromosome maintenance deficient 3 (S. cerevisiae) associated protein |
| (3,5) | Mme           | membrane metallo endopeptidase                                            |
| (3,5) | Ifrd1         | interferon-related developmental regulator 1                              |
| (3,5) | Hsd11b2       | hydroxysteroid 11-beta dehydrogenase 2                                    |
| (3,5) | Hoxd3         | homeo box D3                                                              |
| (3,5) | Hoxb3         | homeo box B3                                                              |
| (3,5) | Hoxa7         | homeo box A7                                                              |
| (3,5) | Hdgf          | hepatoma-derived growth factor                                            |
| (3,5) | Hsp110        | heat shock protein 110                                                    |
| (3,5) | Gna14         | guanine nucleotide binding protein, alpha 14                              |
| (3,5) | Ghitm         | growth hormone inducible transmembrane protein                            |

|       |           |                                                                      |
|-------|-----------|----------------------------------------------------------------------|
| (3,5) | Gab1      | growth factor receptor bound protein 2-associated protein 1          |
| (3,5) | Gclm      | glutamate-cysteine ligase , modifier subunit                         |
| (3,5) | Gtf2f2    | general transcription factor IIF, polypeptide 2                      |
| (3,5) | D6Wsu176e | DNA segment, Chr 6, Wayne State University 176, expressed            |
| (3,5) | D1Pas1    | DNA segment, Chr 1, Pasteur Institute 1                              |
| (3,5) | Cox7b     | cytochrome c oxidase subunit VIIb                                    |
| (3,5) | Calml4    | calmodulin-like 4                                                    |
| (3,5) | Cdh1      | cadherin 1                                                           |
| (3,5) | Brd2      | bromodomain containing 2                                             |
| (3,5) | Aldh2     | aldehyde dehydrogenase 2, mitochondrial                              |
| (3,5) | Atf4      | activating transcription factor 4                                    |
| (3,6) | Wnt2b     | wingless related MMTV integration site 2b                            |
| (3,6) | Wt1       | Wilms tumor homolog                                                  |
| (3,6) | Vav2      | Vav2 oncogene                                                        |
| (3,6) | Tcfcp2l1  | transcription factor CP2-like 1                                      |
| (3,6) | Tcp11     | t-complex protein 11                                                 |
| (3,6) | Sycp1     | synaptonemal complex protein 1                                       |
| (3,6) | Speg      | SPEG complex locus                                                   |
| (3,6) | Slc5a1    | solute carrier family 5 (sodium/glucose cotransporter), member 1     |
| (3,6) | Slc20a1   | solute carrier family 20, member 1                                   |
| (3,6) | Shmt1     | serine hydroxymethyl transferase 1 (soluble)                         |
| (3,6) | S100a6    | S100 calcium binding protein A6 (calcyclin)                          |
| (3,6) | Rbpsuhl   | recombining binding protein suppressor of hairless-like (Drosophila) |
| (3,6) | Pdk1      | pyruvate dehydrogenase kinase, isoenzyme 1                           |
| (3,6) | Pcx       | pyruvate carboxylase                                                 |
| (3,6) | Ptprn2    | protein tyrosine phosphatase, receptor type, N polypeptide 2         |
| (3,6) | Col9a2    | procollagen, type IX, alpha 2                                        |
| (3,6) | Pla2g5    | phospholipase A2, group V                                            |
| (3,6) | Prph1     | peripherin 1                                                         |
| (3,6) | Pax5      | paired box gene 5                                                    |
| (3,6) | Oprd1     | opioid receptor, delta 1                                             |
| (3,6) | Nr5a2     | nuclear receptor subfamily 5, group A, member 2                      |
| (3,6) | Nr5a1     | nuclear receptor subfamily 5, group A, member 1                      |
| (3,6) | Nr0b1     | nuclear receptor subfamily 0, group B, member 1                      |
| (3,6) | Npy5r     | neuropeptide Y receptor Y5                                           |
| (3,6) | Npy2r     | neuropeptide Y receptor Y2                                           |
| (3,6) | Mylpf     | myosin light chain, phosphorylatable, fast skeletal muscle           |
| (3,6) | Msc       | musculin                                                             |
| (3,6) | Mt4       | metallothionein 4                                                    |
| (3,6) | Mep1b     | meprin 1 beta                                                        |
| (3,6) | Mc3r      | melanocortin 3 receptor                                              |
| (3,6) | Ly6g6d    | lymphocyte antigen 6 complex, locus G6D                              |
| (3,6) | Lif       | leukemia inhibitory factor                                           |
| (3,6) | Lefty1    | left right determination factor 1                                    |
| (3,6) | Krt2      | keratin 2                                                            |

|       |         |                                                                |
|-------|---------|----------------------------------------------------------------|
| (3,6) | Itgb3   | integrin beta 3                                                |
| (3,6) | Inhbb   | inhibin beta-B                                                 |
| (3,6) | Hivep3  | human immunodeficiency virus type I enhancer binding protein 3 |
| (3,6) | Hoxa1   | homeo box A1                                                   |
| (3,6) | Gadd45g | growth arrest and DNA-damage-inducible 45 gamma                |
| (3,6) | Gcm1    | glial cells missing homolog 1 (Drosophila)                     |
| (3,6) | Gtf2f1  | general transcription factor IIF, polypeptide 1                |
| (3,6) | Gabpa   | GA repeat binding protein, alpha                               |
| (3,6) | Foxn2   | forkhead box N2                                                |
| (3,6) | Fert2   | fer (fms/fps related) protein kinase, testis specific 2        |
| (3,6) | Fancc   | Fanconi anemia, complementation group C                        |
| (3,6) | Epha3   | Eph receptor A3                                                |
| (3,6) | Enc1    | ectodermal-neural cortex 1                                     |
| (3,6) | Dmrt1   | doublesex and mab-3 related transcription factor 1             |
| (3,6) | Ddit3   | DNA-damage inducible transcript 3                              |
| (3,6) | Cyp2b10 | cytochrome P450, family 2, subfamily b, polypeptide 10         |
| (3,6) | C1ql1   | complement component 1, q subcomponent-like 1                  |
| (3,6) | Commd1  | COMM domain containing 1                                       |
| (3,6) | Cldn11  | claudin 11                                                     |
| (3,6) | Cd80    | CD80 antigen                                                   |
| (3,6) | Cd19    | CD19 antigen                                                   |
| (3,6) | Car3    | carbonic anhydrase 3                                           |
| (3,6) | Camk2d  | calcium/calmodulin-dependent protein kinase II, delta          |
| (3,6) | Bckdha  | branched chain ketoacid dehydrogenase E1, alpha polypeptide    |
| (3,6) | Akr1b8  | aldo-keto reductase family 1, member B8                        |
| (3,6) | Arl4a   | ADP-ribosylation factor-like 4A                                |

---
