# Supplementary material for: Modeling Co-Expression across Species for Complex Traits: Insights to the Difference of Human and Mouse Embryonic Stem Cells
Source: PLoS Comput Biol. 2010 Mar 12;6(3):e1000707. doi: 10.1371/journal.pcbi.1000707 (PMC2837392; doi:10.1371/journal.pcbi.1000707)
Supplement: Table S4 — Conserved transcription regulators in human and mouse ES cells. Genes with a & may act as transcriptional repressors or corepressors. (0.01 MB PDF) [file pcbi.1000707.s012.pdf]

**Table S4: Conserved transcription regulators in human and mouse ES cells.** Genes with a & may act as transcriptional repressors or corepressors.

| Function                                 | Gene                                                                                                                                       |
|------------------------------------------|--------------------------------------------------------------------------------------------------------------------------------------------|
| Basic transcription machinery            | BTF3, TAF1C, RRN3                                                                                                                          |
| Sequence dependent transcription factors | OCT4, SOX2, NANOG, UTF1, ZFP64, MTF2, ETV4, POU1F1, POU2F1, HESX1, E2F8 <sup>&amp;</sup> , TGIF1 <sup>&amp;</sup> , CTBP2 <sup>&amp;</sup> |
| Chromatin modification                   | EED <sup>&amp;</sup> , PHC1 <sup>&amp;</sup> , SMARCD1, SUPT4H1 <sup>&amp;</sup> , SUV39H1, MYST2, RUVBL1                                  |
| DNA methylation                          | DNMT1 <sup>&amp;</sup> , DNMT3B <sup>&amp;</sup>                                                                                           |
| Histone acetylation                      | SAP30 <sup>&amp;</sup> , MYST2                                                                                                             |
